# Supplementary material for: A-to-I editing in human miRNAs is enriched in seed sequence, influenced by sequence contexts and significantly hypoedited in glioblastoma multiforme
Source: PubMed Central journal article supplement (PMC5446428; doi:10.1038/s41598-017-02397-6), 2017-05-26
Supplement: 41598_2017_2397_MOESM1_ESM.pdf [file 41598_2017_2397_MOESM1_ESM.pdf]

# A-to-I editing in human miRNAs is enriched in seed sequence, influenced by sequence contexts and significantly hypoadenylated in glioblastoma multiforme

Deepanjan Paul<sup>1,2</sup>, Ashis Narayan Sinha<sup>1</sup>, Arjun Ray<sup>1,2</sup>, Megha Lal<sup>1,2</sup>, Subhashree Nayak<sup>3</sup>, Anchal Sharma<sup>1,2</sup>, Bharati Mehani<sup>1,2</sup>, Debasish Mukherjee<sup>1</sup>, Saurabh V. Laddha<sup>1</sup>, Ashish Suri<sup>4</sup>, Chitra Sarkar<sup>3</sup>, Arijit Mukhopadhyay<sup>1,2,5\*</sup>

<sup>1</sup>Genomics & Molecular Medicine Unit, CSIR-Institute of Genomics & Integrative Biology, Delhi, India

<sup>2</sup>Academy of Scientific and Innovative Research (AcSIR), Delhi, India

<sup>3</sup>Department of Pathology, All India Institute of Medical Sciences, Delhi, India

<sup>4</sup>Department of Neurosurgery, All India Institute of Medical Sciences, Delhi, India

<sup>5</sup>School of Environment and Life Sciences, University of Salford, United Kingdom

Short Title: MiRNA editing in human brain

Key words: MiRNA, editing, expression, brain, Glioblastoma Multiforme (GBM)

\*Corresponding author: Arijit Mukhopadhyay ([a.mukhopadhyay@salford.ac.uk](mailto:a.mukhopadhyay@salford.ac.uk) or [arijit.mukhopadhyay@gmail.com](mailto:arijit.mukhopadhyay@gmail.com))

**Supplemental data:** This document contains all the supplemental data (figures and tables). The supplemental figures are provided first followed by supplemental tables in a sequential manner in which they are mentioned in the manuscript.

### Supplemental Figure S1

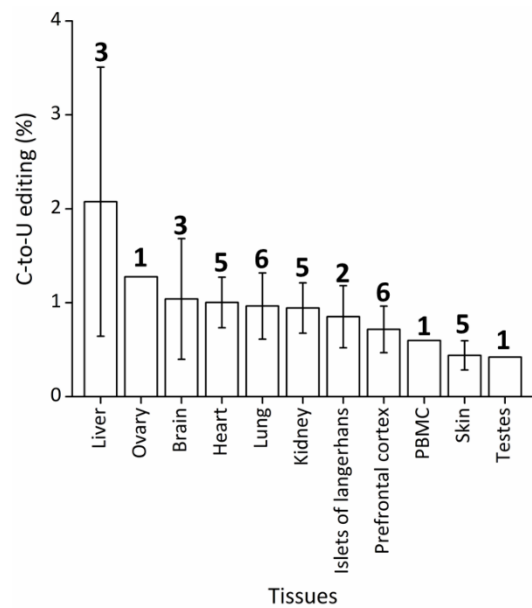

**S1: Distribution of C-to-U editing in different healthy human tissues.** The percentage miRNA editing was calculated by dividing the number of edited miRNAs by the total number of miRNAs expressed with a read count greater than equal to 10. Liver showed the maximum number of editing in mature miRNAs, with testes showing the least amount of C-to-U editing. The numbers above the bars represent the number of different individuals analysed.

## Supplemental Figure S2

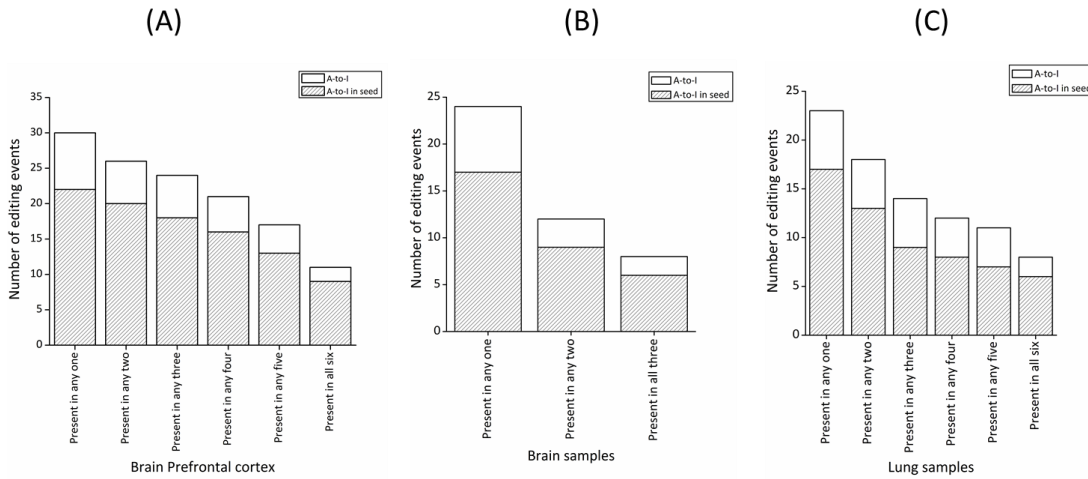

**S2: Recurrence of editing and seed editing events across samples increases the confidence of called sites.** (A). 11 (nine in seed) A-to-I editing events out of 30 non-redundant (22 in seed) are present in all six prefrontal cortex samples. (B). Eight (six in seed) A-to-I editing events out of 24 non-redundant (18 in seed) events are present in all three brain samples (C). Eight (six in seed) editing events out of 23 non-redundant (17 in seed) events are present in all six lung samples.

## Supplemental Figure S3

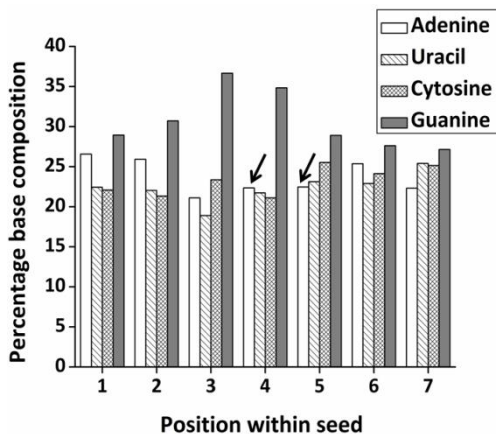

**S3: Distribution of bases in the seed sequence of mature miRNAs.** Percentage base composition for 2578 mature human miRNAs (miRBase 20) do not show enrichment of adenine at the 4<sup>th</sup> and 5<sup>th</sup> (marked by black arrow) position of the seed.

## Supplemental Figure S4

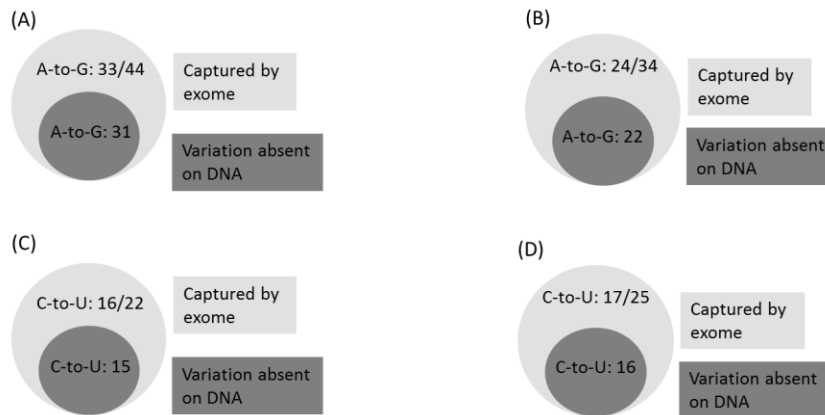

**S4: Exome sequencing was used to rule out variation at the DNA level.** For A-to-G, 75% (33/44) and 70.58% (24/34) of the modifications were captured by exome sequencing in FC (A) and CC (B), respectively. 31 out of 33 and 22 out of 24 did not show variation at the DNA level.

For C-to-U, 72.72% (16/22) and 68% (17/25) of the modifications were captured by exome sequencing in FC (C) and CC (D), respectively. 15 out of 16 and 16 out of 17 did not show variation at the DNA level.

## Supplemental Figure S5

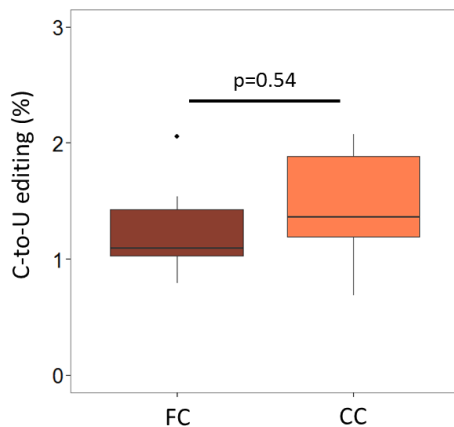

**S5: C-to-U editing in FC and CC samples.** FC and CC samples did not show any significant (two-tailed t-test,  $p=0.54$ ) difference in the extent of C-to-U editing in mature miRNAs.

### Supplemental Figure S6

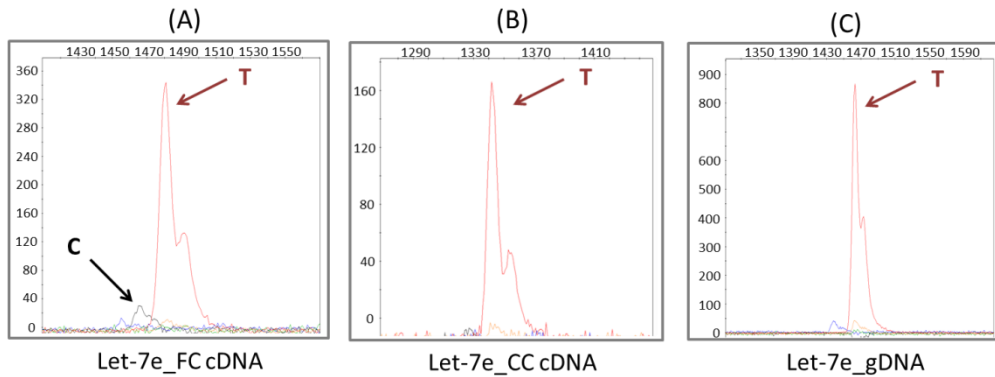

**S6: SnaPshot validation of Let-7e seed A to I (G) editing event.** The X- and Y-axes represents the relative size of the SnaPshot product and relative fluorescence unit (RFU), respectively. An editing event (marked by C) is observed specific to frontal cortex RNA (panel A) which was absent in the corpus callosum RNA (panel B) and the genomic DNA of the same individual (panel C). The SnaPshot specific primer was chosen from the negative strand, hence A to I (G) editing is depicted as T and C peaks. The low peak intensity of the edited site in panel A is commensurate with the low level of editing detected in FC RNA (upto 4.76%).

### Supplemental Figure S7

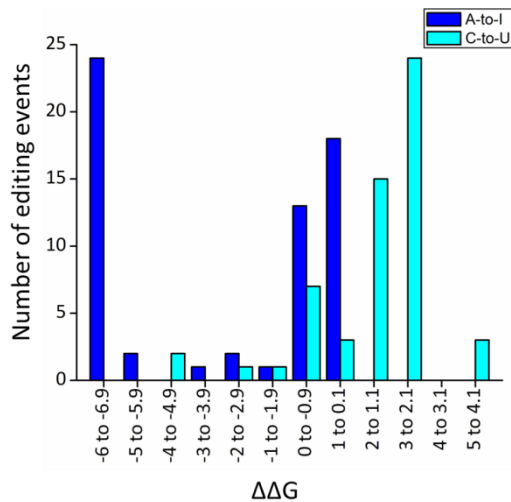

**S7: Two-dimensional RNA structure prediction for A-to-I and C-to-U edited miRNAs.** 55% (33/60) A-to-I sites on pre-miRNA showed an increase in stability ( $\Delta\Delta G < \text{zero}$ ) compared to 10.71% (6/56) for C-to-U sites.

### Supplemental Figure S8

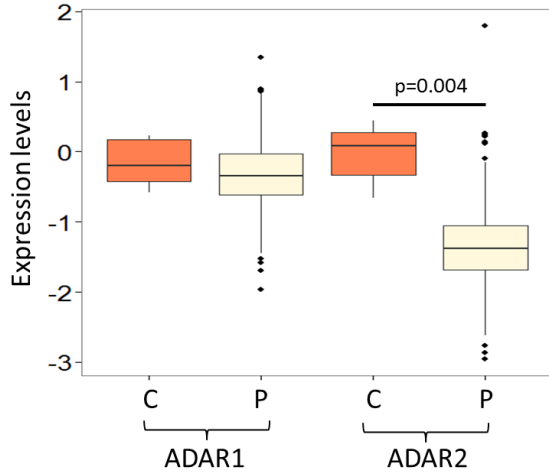

**S8: The Cancer Genome Atlas (TCGA) data showing ADAR1 and ADAR2 expression in GBM compared to controls.** Analysis of 593 GBM patients (represented as “P”) and 10 controls (represented as “C”) showed significant (two-tailed wilcoxon test, followed by Bonferroni correction) down regulation for ADAR2 ( $p=0.004$ ) and not ADAR1 ( $p=0.2$ ).

### Supplemental Figure S9

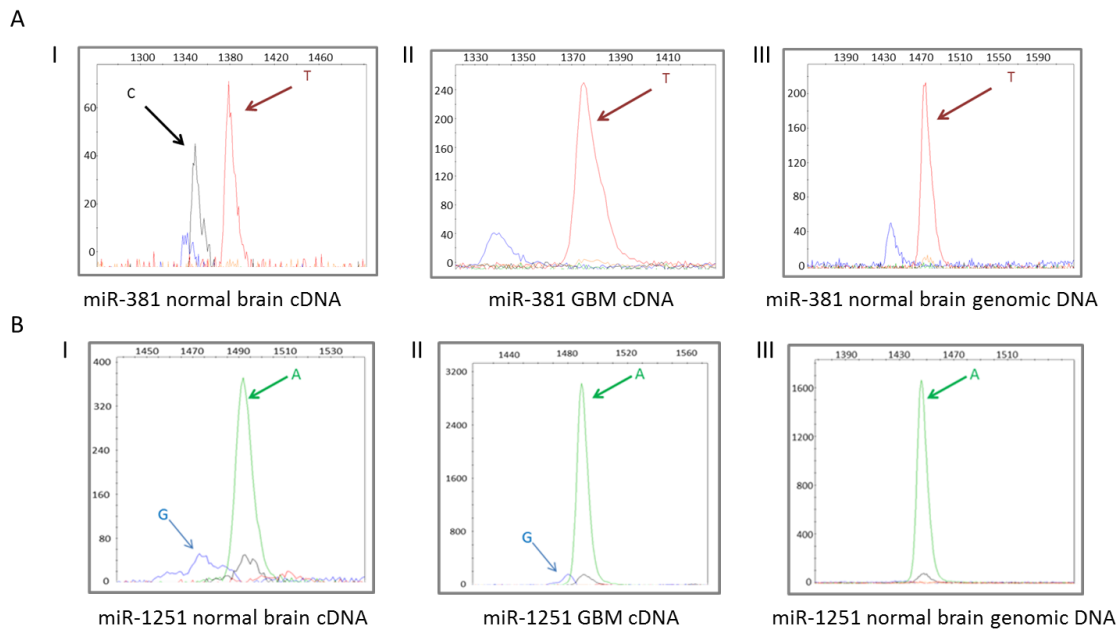

**S9: SnapShot validation of hypoediting in GBM.** The X- and Y-axes represents the relative size of the SnapShot product and relative fluorescence unit (RFU) respectively. Validation of two hypo-editing events is shown here for miR-381 (panel A) and miR-1251 (Panel B). In both cases the editing event observed in normal brain RNA (I) is either absent or decreased in the GBM tumor RNA (II) and absent in the normal genomic DNA (III). The SnapShot specific primer for miR-381 was chosen from the negative strand, hence A to I (G) editing is depicted as T and C peaks. For miR-1251, forward primer was used and depicted as A and G peaks.

### Supplemental Figure S10

A

|      | Pri-mir-411  |          |        | Pre-mir-411  |          |        | hsa-miR-411  |          |        |
|------|--------------|----------|--------|--------------|----------|--------|--------------|----------|--------|
|      | Empty vector | Unedited | Edited | Empty vector | Unedited | Edited | Empty vector | Unedited | Edited |
| Rep1 | 8.26         | -3.99    | -4.59  | 9.94         | -3.77    | -4.06  | 6.89         | 2.48     | 0.53   |
| Rep2 | 7.48         | -4.89    | -5.23  | 9.59         | -4.64    | -4.72  | 7.13         | 1.58     | -0.09  |
| Rep3 | 6.45         | -4.86    | -4.75  | 8.06         | -4.54    | -4.33  | 6.79         | 1.92     | 0.13   |

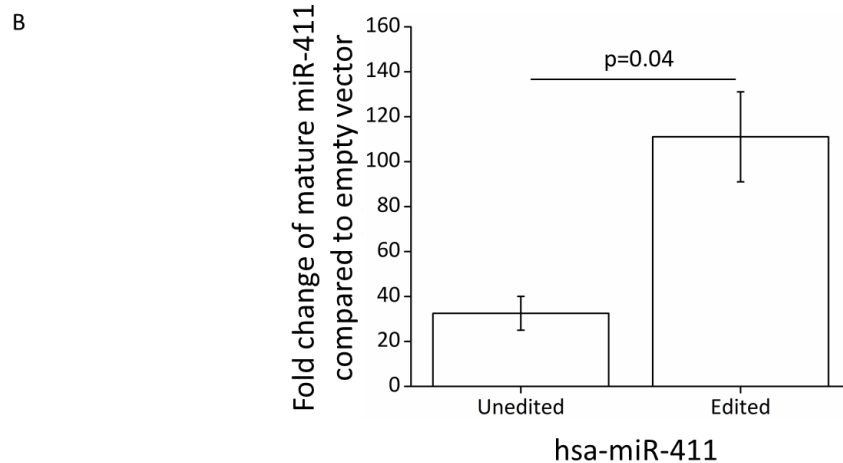

**S10: Mir-411 over expression in HEK293T cells.** (A) The delta Ct values of empty vector, unedited and edited mir-411 construct for Pri-, Pre- and mature mir-411. (B) Edited mir-411 in the mature form is significantly (two-tailed t-test on fold change,  $p=0.04$ ) over expressed than its unedited version when compared with empty vector control.

### Supplemental Figure S11

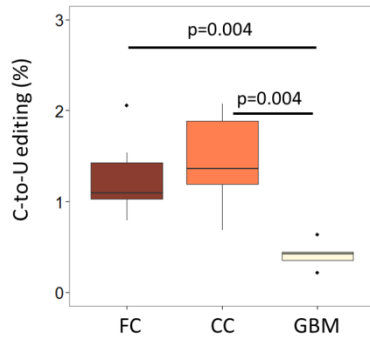

**S11: C-to-U editing in mature miRNAs in FC, CC and GBM samples.** Small RNA sequencing reveal significant (two-tailed t-test) genome-wide C-to-U hypo-editing in five glioblastoma multiforme compared to six FC ( $p=0.004$ ) and six CC samples ( $p=0.004$ ).

### Supplemental Figure S12

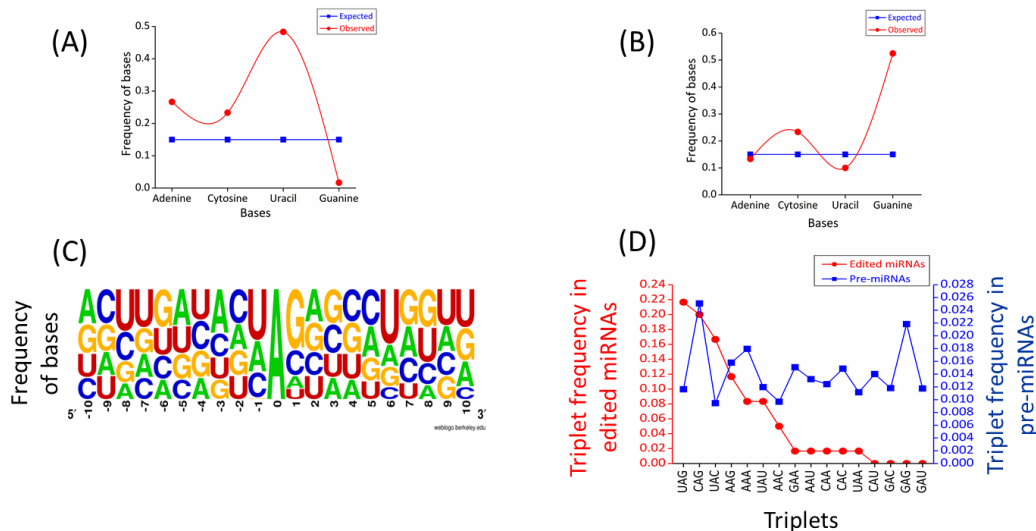

**S12: A-to-I editing sites have a distinct sequence motif.** (A) And (B) The Y-axis shows the frequency of bases one base upstream (A) and downstream (B), respectively, of the edited adenosine. There is a preference for “U” (and aversion for “G”) and preference for “G” in the upstream and downstream, respectively, of the edited adenosine. (C) Motif analysis 10 bases upstream and downstream of the edited adenosine revealed “UAG” as the preferred motif for ADAR family members. (D) The primary and the secondary y-axis represent triplet frequencies in edited and pre-miRNAs, respectively. X-axis shows the 16 possible triplets with “A” in the middle. The figure shows that UAG is not enriched in pre-miRNAs and that “UAG” is indeed a preferred motif for ADAR family members.



**Supplemental Table S1: Samples/Data used in the study**

| Tissues                                   | Sample state | Number_of_samples_analyzed | Data source                         | Accession Id            |
|-------------------------------------------|--------------|----------------------------|-------------------------------------|-------------------------|
| Prefrontal cortex                         | Healthy      | 6                          | Publicly available                  | SRP052236               |
| Frontal cortex (FC)                       | Healthy      | 6                          | In-house                            | SRP063390               |
| Corpus callosum (CC)                      | Healthy      | 6                          | In-house                            | SRP063390               |
| Brain                                     | Healthy      | 3                          | 2 In-house and 1 publicly available | SRP063390 and SRR950878 |
| Lung                                      | Healthy      | 6                          | Publicly available                  | SRA052320               |
| Islet of Langerhans                       | Healthy      | 2                          | Publicly available                  | SRR871609, SRR871652    |
| Skin                                      | Healthy      | 5                          | Publicly available                  | SRA044989               |
| Kidney                                    | Healthy      | 5                          | Publicly available                  | SRA025095               |
| Ovary                                     | Healthy      | 1                          | In-house                            | SRP063390               |
| Testes                                    | Healthy      | 1                          | In-house                            | SRP063390               |
| Heart                                     | Healthy      | 5                          | Publicly available                  | SRP021193               |
| Peripheral blood mononuclear cells (PBMC) | Healthy      | 1                          | Publicly available                  | SRR353657               |
| Liver                                     | Healthy      | 3                          | Publicly available                  | SRP002272               |
| Glioblastoma multiforme (GBM)             | Diseased     | 5                          | In-house                            | SRP063390               |

**Details of in-house samples**

| Samples      | Age (in years) | Gender | Time elapsed after death | Tissue collected |
|--------------|----------------|--------|--------------------------|------------------|
| Individual 1 | 55             | Male   | 7 hours                  | FC, CC           |
| Individual 2 | 35             | Male   | 6 hours 20 minutes       | FC, CC           |
| Individual 3 | 27             | Male   | 6 hours 30 minutes       | FC, CC           |
| Individual 4 | 45             | Female | 4 hours                  | FC, CC           |
| Individual 5 | 40             | Male   | 7 hours                  | FC, CC           |
| Individual 6 | 23             | Male   | 6 hours 20 minutes       | FC, CC           |

|                                               |
|-----------------------------------------------|
| Commercial RNA                                |
| Clontech Brain total RNA (Cat No.- 636530)    |
| Stratagene Brain total RNA (Cat No.- 540005)  |
| Stratagene Testes total RNA (Cat No.- 540049) |
| Stratagene Ovary total RNA (Cat No.- 540071)  |

| GBM Samples | Age (in Years) | Gender |
|-------------|----------------|--------|
| GBM 1       | 48             | Male   |
| GBM 2       | 40             | Male   |
| GBM 3       | 40             | Male   |
| GBM 4       | 50             | Male   |
| GBM 5       | 67             | Male   |

**Supplemental Table S2: Non-redundant canonical miRNA editing events**

**A-to-I editing events (Total = 60)**

| #CHROM | START     | END       | STRAND | miRNA           | Editing position in pre-miRNA | Seed |
|--------|-----------|-----------|--------|-----------------|-------------------------------|------|
| chr9   | 96941180  | 96941181  | +      | hsa-let-7d-3p   | 66                            | Yes  |
| chr19  | 52196094  | 52196095  | +      | hsa-let-7e-3p   | 57                            | Yes  |
| chr11  | 122023003 | 122023004 | -      | hsa-miR-100-5p  | 13                            | No   |
| chr12  | 97885695  | 97885696  | +      | hsa-miR-1251-5p | 10                            | Yes  |
| chr2   | 25551538  | 25551539  | -      | hsa-miR-1301-3p | 52                            | Yes  |
| chr11  | 57408725  | 57408726  | +      | hsa-miR-130a-3p | 56                            | Yes  |
| chr16  | 69967020  | 69967021  | +      | hsa-miR-140-5p  | 38                            | No   |
| chr12  | 54731035  | 54731036  | +      | hsa-miR-148b-5p | 37                            | No   |

|       |           |           |   |                   |    |     |
|-------|-----------|-----------|---|-------------------|----|-----|
| chr8  | 141742703 | 141742704 | - | hsa-miR-151a-3p   | 49 | Yes |
| chr17 | 6920962   | 6920963   | - | hsa-miR-195-3p    | 58 | Yes |
| chr1  | 1102543   | 1102544   | + | hsa-miR-200b-3p   | 61 | Yes |
| chr14 | 104583776 | 104583777 | - | hsa-miR-203b-3p   | 64 | No  |
| chr17 | 1953601   | 1953602   | - | hsa-miR-212-3p    | 73 | Yes |
| chr1  | 172107971 | 172107972 | - | hsa-miR-214-3p    | 76 | Yes |
| chr19 | 13947155  | 13947156  | - | hsa-miR-24-2-5p   | 18 | Yes |
| chr19 | 13947267  | 13947268  | - | hsa-miR-27a-3p    | 64 | No  |
| chr19 | 13947275  | 13947276  | - | hsa-miR-27a-3p    | 56 | Yes |
| chr19 | 13947321  | 13947322  | - | hsa-miR-27a-3p    | 10 | No  |
| chr9  | 97847791  | 97847792  | + | hsa-miR-27b-3p    | 66 | Yes |
| chr9  | 97847789  | 97847790  | + | hsa-miR-27b-3p    | 64 | Yes |
| chr22 | 22007331  | 22007332  | + | hsa-miR-301b-3p   | 63 | No  |
| chr10 | 97824086  | 97824087  | - | hsa-miR-3157-3p   | 70 | No  |
| chr16 | 593349    | 593350    | + | hsa-miR-3176      | 74 | No  |
| chr14 | 101340894 | 101340895 | + | hsa-miR-337-3p    | 66 | Yes |
| chr5  | 179442327 | 179442328 | - | hsa-miR-340-3p    | 70 | No  |
| chr8  | 27559221  | 27559222  | + | hsa-miR-3622a-5p  | 29 | No  |
| chr2  | 12339264  | 12339265  | + | hsa-miR-3681-5p   | 10 | Yes |
| chr21 | 9826243   | 9826244   | + | hsa-miR-3687      | 42 | Yes |
| chr14 | 101531981 | 101531982 | + | hsa-miR-369-3p    | 48 | Yes |
| chrX  | 73438406  | 73438407  | - | hsa-miR-374b-3p   | 47 | Yes |
| chr14 | 101507126 | 101507127 | + | hsa-miR-376a-1-5p | 9  | Yes |
| chr14 | 101506419 | 101506420 | + | hsa-miR-376a-2-5p | 15 | Yes |

|       |           |           |   |                  |    |     |
|-------|-----------|-----------|---|------------------|----|-----|
| chr14 | 101506073 | 101506074 | + | hsa-miR-376c-3p  | 48 | Yes |
| chr14 | 101528439 | 101528440 | + | hsa-miR-377-3p   | 54 | No  |
| chr14 | 101488411 | 101488412 | + | hsa-miR-379-5p   | 10 | Yes |
| chr14 | 101512307 | 101512308 | + | hsa-miR-381-3p   | 52 | Yes |
| chr14 | 101489680 | 101489681 | + | hsa-miR-411-5p   | 20 | Yes |
| chrX  | 73438242  | 73438243  | - | hsa-miR-421      | 54 | Yes |
| chr9  | 116971744 | 116971745 | + | hsa-miR-455-5p   | 32 | No  |
| chr8  | 125834233 | 125834234 | + | hsa-miR-4662a-5p | 8  | Yes |
| chr17 | 15154965  | 15154966  | - | hsa-miR-4731-3p  | 48 | Yes |
| chr1  | 176998525 | 176998526 | - | hsa-miR-488-3p   | 56 | Yes |
| chr17 | 6921316   | 6921317   | - | hsa-miR-497-5p   | 25 | Yes |
| chrX  | 133680421 | 133680422 | - | hsa-miR-503-5p   | 7  | Yes |
| chrX  | 146271285 | 146271286 | - | hsa-miR-513c-5p  | 20 | Yes |
| chr14 | 101513674 | 101513675 | + | hsa-miR-539-5p   | 18 | No  |
| chr7  | 5535482   | 5535483   | - | hsa-miR-589-3p   | 66 | Yes |
| chr7  | 5535483   | 5535484   | - | hsa-miR-589-3p   | 65 | Yes |
| chr8  | 10892750  | 10892751  | - | hsa-miR-598-3p   | 62 | Yes |
| chr10 | 53059385  | 53059386  | + | hsa-miR-605-3p   | 54 | Yes |
| chr10 | 53059349  | 53059350  | + | hsa-miR-605-5p   | 18 | Yes |
| chr14 | 31483925  | 31483926  | - | hsa-miR-624-5p   | 23 | Yes |
| chr19 | 40788530  | 40788531  | - | hsa-miR-641-5p   | 18 | Yes |
| chr19 | 40788531  | 40788532  | - | hsa-miR-641-5p   | 17 | Yes |
| chr11 | 59976570  | 59976571  | - | hsa-miR-6503-3p  | 59 | Yes |
| chr1  | 220373943 | 220373944 | - | hsa-miR-664a-5p  | 18 | Yes |

|       |           |           |   |                |    |     |
|-------|-----------|-----------|---|----------------|----|-----|
| chr14 | 101514298 | 101514299 | + | hsa-miR-889-3p | 62 | No  |
| chr3  | 189547768 | 189547769 | + | hsa-miR-944    | 59 | Yes |
| chr21 | 17911420  | 17911421  | + | hsa-miR-99a-5p | 13 | No  |
| chr19 | 52195910  | 52195911  | + | hsa-miR-99b-3p | 47 | Yes |

**C-to-U editing events (Total=56)**

| #CHROM | START     | END       | STRAND | miRNA            | Editing position in pre-miRNA | Seed |
|--------|-----------|-----------|--------|------------------|-------------------------------|------|
| chr11  | 122022991 | 122022992 | -      | hsa-mir-100-5p   | 25                            | No   |
| chr11  | 122022999 | 122023000 | -      | hsa-mir-100-5p   | 17                            | Yes  |
| chr7   | 99691669  | 99691670  | -      | hsa-mir-106b-5p  | 28                            | No   |
| chr18  | 56118329  | 56118330  | +      | hsa-mir-122-5p   | 25                            | No   |
| chr19  | 52196530  | 52196531  | +      | hsa-mir-125a-5p  | 25                            | No   |
| chr1   | 171070890 | 171070891 | -      | hsa-mir-1295a    | 57                            | No   |
| chr10  | 65132734  | 65132735  | -      | hsa-mir-1296-3p  | 74                            | No   |
| chr10  | 105154102 | 105154103 | -      | hsa-mir-1307-5p  | 56                            | No   |
| chr3   | 44155727  | 44155728  | +      | hsa-mir-138-1-5p | 25                            | Yes  |
| chr5   | 148808552 | 148808553 | +      | hsa-mir-143-3p   | 73                            | No   |
| chr17  | 46114558  | 46114559  | -      | hsa-mir-152-3p   | 55                            | Yes  |
| chr19  | 13985586  | 13985587  | +      | hsa-mir-181c-3p  | 75                            | No   |
| chr19  | 13985547  | 13985548  | +      | hsa-mir-181c-5p  | 36                            | No   |
| chr3   | 49058117  | 49058118  | -      | hsa-mir-191-5p   | 25                            | No   |
| chr13  | 92003206  | 92003207  | +      | hsa-mir-19a-3p   | 63                            | No   |

|       |           |           |   |                   |    |     |
|-------|-----------|-----------|---|-------------------|----|-----|
| chr12 | 7072912   | 7072913   | + | hsa-mir-200c-3p   | 52 | No  |
| chr9  | 73424957  | 73424958  | - | hsa-mir-204-5p    | 43 | No  |
| chr14 | 23857821  | 23857822  | - | hsa-mir-208a-3p   | 54 | No  |
| chr14 | 23887216  | 23887217  | - | hsa-mir-208b-3p   | 56 | No  |
| chr17 | 57918645  | 57918646  | + | hsa-mir-21-5p     | 20 | No  |
| chr9  | 131154960 | 131154961 | - | hsa-mir-219a-2-5p | 33 | No  |
| chr17 | 1617221   | 1617222   | - | hsa-mir-22-3p     | 60 | Yes |
| chr19 | 13947426  | 13947427  | - | hsa-mir-23a-3p    | 47 | Yes |
| chr9  | 97847548  | 97847549  | + | hsa-mir-23b-3p    | 60 | Yes |
| chr9  | 97847555  | 97847556  | + | hsa-mir-23b-3p    | 67 | No  |
| chr7  | 130561521 | 130561522 | - | hsa-mir-29a-3p    | 48 | Yes |
| chr6  | 72113309  | 72113310  | - | hsa-mir-30a-5p    | 15 | No  |
| chr6  | 72113308  | 72113309  | - | hsa-mir-30a-5p    | 16 | No  |
| chr8  | 135817172 | 135817173 | - | hsa-mir-30d-5p    | 16 | No  |
| chr1  | 41220052  | 41220053  | + | hsa-mir-30e-5p    | 27 | No  |
| chr1  | 41220051  | 41220052  | + | hsa-mir-30e-5p    | 26 | No  |
| chr14 | 101522614 | 101522615 | + | hsa-mir-323b-3p   | 60 | No  |
| chr19 | 46142271  | 46142272  | - | hsa-mir-330-3p    | 74 | No  |
| chr22 | 42296966  | 42296967  | + | hsa-mir-33a-5p    | 20 | No  |
| chr14 | 100576067 | 100576068 | + | hsa-mir-342-3p    | 77 | No  |
| chr1  | 9211800   | 9211801   | - | hsa-mir-34a-5p    | 36 | No  |
| chrX  | 73438431  | 73438432  | - | hsa-mir-374b-5p   | 22 | No  |
| chr2  | 219866380 | 219866381 | - | hsa-mir-375       | 50 | No  |
| chr14 | 101531658 | 101531659 | + | hsa-mir-409-5p    | 23 | No  |

|       |           |           |   |                 |    |     |
|-------|-----------|-----------|---|-----------------|----|-----|
| chrX  | 73438246  | 73438247  | - | hsa-mir-421     | 50 | Yes |
| chr17 | 28444165  | 28444166  | + | hsa-mir-423-3p  | 70 | No  |
| chr3  | 49057642  | 49057643  | - | hsa-mir-425-5p  | 25 | No  |
| chr3  | 49057646  | 49057647  | - | hsa-mir-425-5p  | 21 | Yes |
| chr17 | 27188432  | 27188433  | - | hsa-mir-451a    | 26 | No  |
| chr17 | 27188431  | 27188432  | - | hsa-mir-451a    | 27 | No  |
| chr9  | 20716128  | 20716129  | + | hsa-mir-491-5p  | 26 | No  |
| chr17 | 40666235  | 40666236  | + | hsa-mir-5010-5p | 31 | No  |
| chr8  | 10892737  | 10892738  | - | hsa-mir-598-3p  | 75 | No  |
| chr8  | 10892779  | 10892780  | - | hsa-mir-598-5p  | 33 | No  |
| chr19 | 46522226  | 46522227  | + | hsa-mir-769-5p  | 38 | No  |
| chr21 | 17911432  | 17911433  | + | hsa-mir-99a-5p  | 25 | No  |
| chr21 | 17911424  | 17911425  | + | hsa-mir-99a-5p  | 17 | Yes |
| chr21 | 17911436  | 17911437  | + | hsa-mir-99a-5p  | 29 | No  |
| chr21 | 17911431  | 17911432  | + | hsa-mir-99a-5p  | 24 | No  |
| chr19 | 52195882  | 52195883  | + | hsa-mir-99b-5p  | 19 | No  |
| chr2  | 219267390 | 219267391 | + | hsa-mir-26b-5p  | 23 | No  |

## Tissue wise distribution of A-to-I and C-to-U events

### 1. Prefrontal cortex

| miRNA             | Editing position in pre-miRNA | Mismatch | Alternate/Total reads |            |            |            |            |            | Presence in seed |
|-------------------|-------------------------------|----------|-----------------------|------------|------------|------------|------------|------------|------------------|
|                   |                               |          | SRR1759212            | SRR1759213 | SRR1759214 | SRR1759215 | SRR1759216 | SRR1759217 |                  |
| hsa-mir-411-5p    | 20                            | AG       | 3747/16488            | 5544/24437 | 4475/20905 | 2966/12445 | 5461/23792 | 1805/5344  | Yes              |
| hsa-mir-381-3p    | 52                            | AG       | 574/7974              | 679/9973   | 512/9594   | 332/5177   | 573/8153   | 248/2185   | Yes              |
| hsa-mir-99a-5p    | 13                            | AG       | 1265/33302            | 1684/43984 | 1072/28015 | 917/26399  | 1172/28912 | 1278/34929 | No               |
| hsa-mir-1301-3p   | 52                            | AG       | 166/1217              | 279/1773   | 157/1352   | 180/1044   | 228/1415   | 131/828    | Yes              |
| hsa-mir-27b-3p    | 64                            | AG       | 300/61976             | 385/105482 | 293/90232  | 225/63542  | 409/89414  | 298/48744  | Yes              |
| hsa-mir-151a-3p   | 49                            | AG       | 61/1682               | 76/2637    | 48/2354    | 48/1578    | 78/2238    | 40/1080    | Yes              |
| hsa-mir-1251-5p   | 10                            | AG       | 30/201                | 19/126     | 15/139     | 15/124     | 12/112     | 17/192     | Yes              |
| hsa-mir-376c-3p   | 48                            | AG       | 22/341                | 29/446     | 16/294     | 14/241     | 17/211     | 76/1049    | Yes              |
| hsa-mir-130a-3p   | 56                            | AG       | 38/3038               | 29/3484    | 23/2923    | 27/1975    | 32/2937    | 32/2206    | Yes              |
| hsa-mir-589-3p    | 66                            | AG       | 10/29                 | 11/37      | 11/29      | 7/15       | 12/20      | -          | Yes              |
| hsa-mir-376a-1-5p | 9                             | AG       | 22/1060               | 23/1219    | 12/974     | 17/742     | 15/905     | 26/572     | Yes              |
| hsa-mir-889-3p    | 62                            | AG       | 26/2576               | 17/2175    | 13/1649    | 13/1247    | 16/2667    | 9/790      | No               |
| hsa-mir-200b-3p   | 61                            | AG       | 7/59                  | 10/111     | -          | -          | 15/105     | 4/38       | Yes              |
| hsa-mir-99b-3p    | 47                            | AG       | 10/348                | 9/423      | -          | 13/281     | 10/307     | 14/397     | Yes              |
| hsa-mir-598-3p    | 62                            | AG       | 26/5131               | 21/3710    | -          | -          | 16/2720    | 26/3284    | Yes              |



|                 |    |    |         |         |         |         |         |         |     |
|-----------------|----|----|---------|---------|---------|---------|---------|---------|-----|
| hsa-mir-421     | 54 | AG | 15/1492 | -       | 16/1785 | 15/1123 | 18/1853 | 10/608  | Yes |
| hsa-mir-340-3p  | 70 | AG | 11/732  | 13/952  | 10/1018 | -       | -       | -       | No  |
| hsa-mir-148b-5p | 37 | AG | 9/397   | -       | 11/525  | 7/417   | 10/504  | 7/357   | No  |
| hsa-mir-301b-3p | 63 | AG | 8/311   | 12/455  | 9/424   | -       | 7/365   | -       | No  |
| hsa-mir-27a-3p  | 56 | AG | 12/1322 | 14/1974 | -       | -       | 11/1421 | 13/1302 | Yes |
| hsa-mir-664a-5p | 18 | AG | 5/98    | 12/123  | 7/71    | -       | 10/131  | 8/65    | Yes |
| hsa-mir-539-5p  | 18 | AG | -       | 12/289  | 6/208   | 6/171   | 9/263   | 10/211  | No  |
| hsa-let-7e-3p   | 57 | AG | -       | 8/296   | -       | -       | 7/237   | -       | Yes |
| hsa-mir-337-3p  | 66 | AG | -       | 5/64    | 6/38    | 5/44    | -       | -       | Yes |
| hsa-mir-455-5p  | 32 | AG | -       | 6/233   | -       | -       | -       | -       | No  |
| hsa-mir-641-5p  | 17 | AG | -       | 5/126   | -       | -       | 8/91    | -       | Yes |
| hsa-let-7d-3p   | 66 | AG | -       | -       | 19/1694 | 17/1542 | 11/1449 | -       | Yes |
| hsa-mir-641-5p  | 18 | AG | -       | -       | 5/131   | -       | -       | -       | Yes |
| hsa-mir-3681-5p | 10 | AG | -       | -       | -       | -       | 7/19    | -       | Yes |
| hsa-mir-377-3p  | 54 | AG | -       | -       | -       | -       | -       | 5/41    | No  |

| miRNA          | Editing position in pre-miRNA | Mismatch | Alternate/Total reads |            |            |            |            |            | Presence in seed |
|----------------|-------------------------------|----------|-----------------------|------------|------------|------------|------------|------------|------------------|
|                |                               |          | SRR1759212            | SRR1759213 | SRR1759214 | SRR1759215 | SRR1759216 | SRR1759217 |                  |
| hsa-mir-99a-5p | 25                            | CU       | 441/33767             | 719/44541  | 439/28506  | 435/26881  | 431/29429  | 633/35547  | No               |
| hsa-mir-100-5p | 25                            | CU       | 318/128781            | 594/215457 | 510/166904 | 388/142218 | 439/153969 | 413/134217 | No               |
| hsa-mir-29a-3p | 48                            | CU       | -                     | 166/94709  | 124/68188  | 117/54417  | 128/69832  | -          | Yes              |
| hsa-mir-33a-5p | 20                            | CU       | -                     | 9/707      | -          | -          | -          | -          | No               |

|                |    |    |   |          |   |      |      |   |    |
|----------------|----|----|---|----------|---|------|------|---|----|
| hsa-mir-26b-5p | 23 | CU | - | 56/26954 | - | -    | -    | - | No |
| hsa-mir-425-5p | 25 | CU | - | -        | - | 3/13 | 3/15 | - | No |

## 2. Brain total RNA

| miRNA             | Editing position in pre-miRNA | Mismatch | Alternate/Total reads |                      |            | Presence in seed |
|-------------------|-------------------------------|----------|-----------------------|----------------------|------------|------------------|
|                   |                               |          | Clontech brain RNA    | Stratagene brain RNA | SRR950878  |                  |
| hsa-let-7d-3p     | 66                            | AG       | 24/6026               | 20/4483              | 11/1126    | Yes              |
| hsa-let-7e-3p     | 57                            | AG       | -                     | 7/440                | -          | Yes              |
| hsa-miR-1251-5p   | 10                            | AG       | -                     | 10/186               | -          | Yes              |
| hsa-miR-1301-3p   | 52                            | AG       | 14/489                | -                    | 46/291     | Yes              |
| hsa-miR-148b-5p   | 37                            | AG       | -                     | 11/842               | -          | No               |
| hsa-miR-151a-3p   | 49                            | AG       | 6/193                 | 115/5878             | 49/2104    | Yes              |
| hsa-miR-200b-3p   | 61                            | AG       | -                     | 19/2224              | -          | Yes              |
| hsa-miR-27a-3p    | 56                            | AG       | -                     | -                    | 10/825     | Yes              |
| hsa-miR-27b-3p    | 64                            | AG       | 77/11341              | 235/134843           | 121/72252  | Yes              |
| hsa-miR-340-3p    | 70                            | AG       | -                     | 10/982               | -          | No               |
| hsa-miR-369-3p    | 48                            | AG       | -                     | 20/4707              | -          | Yes              |
| hsa-miR-376a-1-5p | 9                             | AG       | -                     | 17/3561              | 7/49       | Yes              |
| hsa-miR-377-3p    | 54                            | AG       | -                     | 4/62                 | -          | No               |
| hsa-miR-381-3p    | 52                            | AG       | 12/275                | 61/3150              | 176/2939   | Yes              |
| hsa-miR-411-5p    | 20                            | AG       | 32/174                | 7266/9284            | 2868/13729 | Yes              |
| hsa-miR-421       | 54                            | AG       | -                     | -                    | 14/1021    | Yes              |

|                 |    |    |        |          |          |     |
|-----------------|----|----|--------|----------|----------|-----|
| hsa-miR-539-5p  | 18 | AG | 5/51   | 17/408   | 7/171    | No  |
| hsa-miR-589-3p  | 66 | AG | 4/13   | 28/103   | 7/10     | Yes |
| hsa-miR-598-3p  | 62 | AG | -      | 64/15248 | -        | Yes |
| hsa-miR-641-5p  | 18 | AG | -      | 14/271   | -        | Yes |
| hsa-miR-664a-5p | 18 | AG | -      | 9/185    | -        | Yes |
| hsa-miR-889-3p  | 62 | AG | -      | 67/12369 | 13/1847  | No  |
| hsa-miR-99a-5p  | 13 | AG | 15/391 | 238/3751 | 372/9344 | No  |
| hsa-miR-99b-3p  | 47 | AG | 16/588 | -        | 8/171    | Yes |

| miRNA           | Editing position in pre-miRNA | Mismatch | Alternate/Total reads |                      |             | Presence in seed |
|-----------------|-------------------------------|----------|-----------------------|----------------------|-------------|------------------|
|                 |                               |          | Clonetechn brain RNA  | Stratagene brain RNA | SRR950878   |                  |
| hsa-miR-100-5p  | 25                            | CU       | 110/1968              | 2227/60919           | 1045/114686 | No               |
| hsa-miR-99a-5p  | 25                            | CU       | 14/423                | 43/4212              | 300/9825    | No               |
| hsa-miR-100-5p  | 17                            | CU       | -                     | 253/58785            | -           | Yes              |
| hsa-miR-30a-5p  | 15                            | CU       | -                     | 129/23913            | -           | No               |
| hsa-miR-181c-5p | 36                            | CU       | -                     | 115/23469            | -           | No               |
| hsa-miR-342-3p  | 77                            | CU       | -                     | 62/18105             | -           | No               |
| hsa-miR-99b-5p  | 19                            | CU       | -                     | 71/26500             | -           | No               |
| hsa-miR-99a-5p  | 17                            | CU       | -                     | 19/3819              | -           | Yes              |
| hsa-miR-330-3p  | 74                            | CU       | -                     | 9/767                | -           | No               |
| hsa-miR-125a-5p | 25                            | CU       | -                     | 84/45083             | -           | No               |
| hsa-miR-23b-3p  | 60                            | CU       | -                     | 7/448                | -           | Yes              |
| hsa-miR-29a-3p  | 48                            | CU       | -                     | -                    | 34/10380    | Yes              |

### 3. Lung

| miRNA             | Editing position in pre-miRNA | Mismatch | Alternate/Total reads |           |           |            |           |           | Presence in Seed |
|-------------------|-------------------------------|----------|-----------------------|-----------|-----------|------------|-----------|-----------|------------------|
|                   |                               |          | SRR493961             | SRR493963 | SRR493965 | SRR493967  | SRR493969 | SRR493971 |                  |
| hsa-let-7d-3p     | 66                            | AG       | -                     | -         | 13/1701   | -          | -         | 14/1261   | Yes              |
| hsa-miR-100-5p    | 13                            | AG       | -                     | 126/68530 | 235/62799 | 209/113521 | 258/86109 | 183/74051 | No               |
| hsa-miR-140-5p    | 38                            | AG       | -                     | 74/21140  | -         | -          | -         | -         | No               |
| hsa-miR-148b-5p   | 37                            | AG       | -                     | 20/2733   | -         | 13/1499    | 13/1443   | -         | No               |
| hsa-miR-151a-3p   | 49                            | AG       | -                     | 30/4879   | 40/6955   | 59/8642    | 46/8192   | 30/6753   | Yes              |
| hsa-miR-200b-3p   | 61                            | AG       | 87/12905              | 110/14617 | 79/11047  | 118/13033  | 105/15180 | 119/13163 | Yes              |
| hsa-miR-24-2-5p   | 18                            | AG       | -                     | 14/1097   | 13/542    | -          | 8/481     | -         | Yes              |
| hsa-miR-27a-3p    | 56                            | AG       | 125/45339             | 213/86678 | 223/62142 | 287/107320 | 205/68832 | 205/63884 | Yes              |
| hsa-miR-27a-5p    | 10                            | AG       | -                     | 23/2545   | 47/3546   | 26/2582    | 67/3444   | 48/6172   | No               |
| hsa-miR-376a-1-5p | 9                             | AG       | 7/124                 | 7/144     | -         | -          | -         | -         | Yes              |
| hsa-miR-376c-3p   | 48                            | AG       | -                     | 10/602    | -         | -          | -         | -         | Yes              |
| hsa-miR-379-5p    | 10                            | AG       | 15/1035               | 38/1601   | 68/1716   | 44/3872    | 73/2298   | 56/1834   | Yes              |
| hsa-miR-381-3p    | 52                            | AG       | 119/890               | 274/2426  | 193/1038  | 773/2974   | 110/467   | 236/1160  | Yes              |
| hsa-miR-411-5p    | 20                            | AG       | 377/946               | 455/963   | 449/640   | 863/1428   | 545/753   | 529/759   | Yes              |
| hsa-miR-455-5p    | 32                            | AG       | 19/921                | 120/2248  | 56/1100   | 53/1723    | 65/1178   | 49/1041   | No               |
| hsa-miR-4662a-5p  | 8                             | AG       | -                     | -         | -         | -          | -         | 4/35      | Yes              |

|                 |    |    |           |            |            |            |            |            |     |
|-----------------|----|----|-----------|------------|------------|------------|------------|------------|-----|
| hsa-miR-497-5p  | 25 | AG | 18/2484   | 76/5950    | 55/2391    | 26/3222    | 61/2567    | 43/2026    | Yes |
| hsa-miR-503-5p  | 7  | AG | -         | 6/271      | -          | -          | -          | -          | Yes |
| hsa-miR-589-3p  | 66 | AG | -         | 3/13       | -          | 3/19       | -          | -          | Yes |
| hsa-miR-6503-3p | 59 | AG | -         | 3/11       | -          | 9/24       | 5/17       | 8/17       | Yes |
| hsa-miR-664a-5p | 18 | AG | -         | 6/289      | 9/239      | -          | -          | -          | Yes |
| hsa-miR-944     | 59 | AG | -         | -          | -          | -          | -          | 6/77       | Yes |
| hsa-miR-99a-5p  | 13 | AG | 433/11899 | 2913/27073 | 1595/10175 | 1372/17142 | 1509/11495 | 1026/10386 | No  |

| miRNA           | Editing position in pre-miRNA | Mismatch | Alternate/Total reads |            |             |            |              |            | Presence in Seed |
|-----------------|-------------------------------|----------|-----------------------|------------|-------------|------------|--------------|------------|------------------|
|                 |                               |          | SRR493961             | SRR493963  | SRR493965   | SRR493967  | SRR493969    | SRR493971  |                  |
| hsa-miR-451a    | 26                            | CU       | 2168/1487393          | -          | -           | 267/166897 | 868/675672   | -/-        | No               |
| hsa-miR-19a-3p  | 63                            | CU       | 21/3608               | -          | 13/1086     | 12/1102    | 14/842       | 20/850     | No               |
| hsa-miR-425-5p  | 25                            | CU       | 5/80                  | -          | -           | -          | -            | -/-        | No               |
| hsa-miR-30a-5p  | 16                            | CU       | 296/219833            | 974/635825 | 1265/889564 | -          | 1963/1137995 | 971/665914 | No               |
| hsa-miR-29a-3p  | 48                            | CU       | -                     | 148/88125  | -           | -          | 108/64202    | -/-        | Yes              |
| hsa-miR-191-5p  | 25                            | CU       | -                     | 45/18430   | -           | -          | -            | -/-        | No               |
| hsa-miR-30e-5p  | 26                            | CU       | -                     | -          | 294/198560  | -          | 359/233400   | 273/181024 | No               |
| hsa-miR-23a-3p  | 47                            | CU       | -                     | -          | 5/116       | -          | -            | -/-        | Yes              |
| hsa-miR-1295a   | 57                            | CU       | -                     | -          | 3/15        | -          | -            | -/-        | No               |
| hsa-miR-200c-3p | 52                            | CU       | -                     | -          | -           | 150/62867  | 155/76255    | -/-        | No               |

|                 |    |    |   |   |   |   |          |          |    |
|-----------------|----|----|---|---|---|---|----------|----------|----|
| hsa-miR-106b-5p | 28 | CU | - | - | - | - | 38/12601 | 38/14595 | No |
|-----------------|----|----|---|---|---|---|----------|----------|----|

#### 4. Heart

| miRNA           | Editing position in pre-miRNA | Mismatch | Alternate/Total reads |           |           |           |           | Presence in Seed |
|-----------------|-------------------------------|----------|-----------------------|-----------|-----------|-----------|-----------|------------------|
|                 |                               |          | SRR831005             | SRR831007 | SRR831008 | SRR831009 | SRR831010 |                  |
| hsa-miR-376c-3p | 48                            | AG       | -                     | 4/69      | -         | -         | -         | Yes              |
| hsa-miR-381-3p  | 52                            | AG       | 34/1397               | 57/2046   | 50/2157   | 55/1942   | 42/1847   | Yes              |
| hsa-miR-411-5p  | 20                            | AG       | 39/1328               | 137/2820  | 111/3160  | 142/3191  | 119/2690  | Yes              |
| hsa-miR-589-3p  | 66                            | AG       | -                     | 5/16      | -         | -         | -         | Yes              |
| hsa-miR-605-3p  | 54                            | AG       | 9/19                  | 10/31     | 11/34     | 8/35      | 8/29      | Yes              |
| hsa-miR-6503-3p | 59                            | AG       | -                     | 5/10      | -         | 11/25     | 7/20      | Yes              |
| hsa-miR-99a-5p  | 13                            | AG       | 87/34247              | 184/56903 | 136/39498 | 130/40037 | 132/39118 | No               |

| miRNA          | Editing position in pre-miRNA | Mismatch | Alternate/Total reads |           |           |           |           | Presence in Seed |
|----------------|-------------------------------|----------|-----------------------|-----------|-----------|-----------|-----------|------------------|
|                |                               |          | SRR831005             | SRR831007 | SRR831008 | SRR831009 | SRR831010 |                  |
| hsa-miR-99a-5p | 25                            | CU       | 659/34633             | 888/59960 | 580/41610 | 694/42259 | 740/41262 | No               |

|                 |    |    |           |            |            |            |            |    |
|-----------------|----|----|-----------|------------|------------|------------|------------|----|
| hsa-miR-23b-3p  | 67 | CU | 54/17799  | 122/27903  | 83/22743   | -          | 86/29212   | No |
| hsa-miR-100-5p  | 25 | CU | 116/59602 | 226/96834  | -          | 441/203378 | 223/94572  | No |
| hsa-miR-208b-3p | 56 | CU | -         | 373/218889 | 392/214754 | 396/221581 | 495/272680 | No |
| hsa-miR-30a-5p  | 15 | CU | -         | 294/184197 | 206/136705 | -          | -          | No |
| hsa-miR-208a-3p | 54 | CU | -         | 12/1633    | -          | -          | -          | No |

## 5. Kidney

|                   |                               |          | Alternate/Total reads |           |           |           |           |                  |
|-------------------|-------------------------------|----------|-----------------------|-----------|-----------|-----------|-----------|------------------|
| miRNA             | Editing position in pre-miRNA | Mismatch | SRR070240             | SRR070242 | SRR070244 | SRR070246 | SRR070248 | Presence in Seed |
| hsa-miR-151a-3p   | 49                            | AG       | 39/5985               | 29/5099   | -         | 27/5084   | -         | Yes              |
| hsa-miR-200b-3p   | 61                            | AG       | 333/14414             | 349/19524 | 140/12545 | 200/19129 | 51/6587   | Yes              |
| hsa-miR-27a-3p    | 56                            | AG       | -                     | -         | 18/3992   | -         | -         | Yes              |
| hsa-miR-27a-5p    | 10                            | AG       | -                     | -         | -         | -         | 7/454     | No               |
| hsa-miR-376a-1-5p | 9                             | AG       | 4/67                  | -         | -         | -         | -         | Yes              |
| hsa-miR-379-5p    | 10                            | AG       | 20/1500               | 17/935    | -         | -         | -         | Yes              |
| hsa-miR-381-3p    | 52                            | AG       | 179/578               | 110/501   | 142/498   | 151/684   | 38/232    | Yes              |
| hsa-miR-411-5p    | 20                            | AG       | 127/233               | 196/600   | 202/568   | 351/1108  | 48/131    | Yes              |
| hsa-miR-421       | 54                            | AG       | 8/61                  | 8/76      | -         | -         | -         | Yes              |
| hsa-miR-605-3p    | 54                            | AG       | -                     | 6/15      | -         | -         | 5/31      | Yes              |
| hsa-miR-664a-5p   | 18                            | AG       | 18/821                | -         | -         | -         | -         | Yes              |

|                |    |    |         |           |         |           |         |    |
|----------------|----|----|---------|-----------|---------|-----------|---------|----|
| hsa-miR-99a-5p | 13 | AG | 99/9838 | 143/14577 | 78/8301 | 139/15913 | 62/8363 | No |
|----------------|----|----|---------|-----------|---------|-----------|---------|----|

| miRNA          | Editing position in pre-miRNA | Mismatch | Alternate/Total reads |              |            |            |            | Presence in Seed |
|----------------|-------------------------------|----------|-----------------------|--------------|------------|------------|------------|------------------|
|                |                               |          | SRR070240             | SRR070242    | SRR070244  | SRR070246  | SRR070248  |                  |
| hsa-miR-30a-5p | 16                            | CU       | 1651/1242033          | 1342/1028060 | 700/510147 | 914/580062 | 571/311770 | No               |
| hsa-miR-30e-5p | 27                            | CU       | 121/53109             | -            | -          | -          | -          | No               |
| hsa-miR-100-5p | 25                            | CU       | 102/57370             | -            | -          | -          | 147/92378  | No               |
| hsa-miR-99a-5p | 25                            | CU       | -                     | 38/14614     | -          | -          | -          | No               |
| hsa-miR-22-3p  | 60                            | CU       | -                     | 23/6379      | -          | 23/5749    | -          | Yes              |
| hsa-miR-30a-5p | 15                            | CU       | -                     | -            | 742/510187 | -          | 406/311791 | No               |
| hsa-miR-29a-3p | 48                            | CU       | -                     | -            | 47/19894   | 74/30978   | -          | Yes              |
| hsa-miR-152-3p | 55                            | CU       | -                     | -            | 4/55       | -          | -          | Yes              |
| hsa-miR-19a-3p | 63                            | CU       | -                     | -            | -          | -          | 9/191      | No               |

6. Skin



| miRNA             | Editing position in pre-miRNA | Mismatch | Alternate/Total reads |            |            |            |            | Presence in Seed |
|-------------------|-------------------------------|----------|-----------------------|------------|------------|------------|------------|------------------|
|                   |                               |          | SRR330915             | SRR330919  | SRR330921  | SRR330922  | SRR330923  |                  |
| hsa-miR-200b-3p   | 61                            | AG       | 203/22691             | 149/20546  | 241/27465  | 215/26167  | 232/27117  | Yes              |
| hsa-miR-27a-3p    | 56                            | AG       | 562/131991            | 325/131615 | 373/160373 | 312/134740 | 409/144912 | Yes              |
| hsa-miR-27a-5p    | 10                            | AG       | 31/1947               | -          | 14/1678    | -          | 24/1747    | No               |
| hsa-miR-376a-1-5p | 9                             | AG       | 6/139                 | -          | -          | -          | -          | Yes              |
| hsa-miR-376c-3p   | 48                            | AG       | -                     | 11/836     | 16/749     | 18/1140    | -          | Yes              |
| hsa-miR-379-5p    | 10                            | AG       | -                     | 58/6559    | 56/6941    | 89/11064   | 82/7823    | Yes              |
| hsa-miR-381-3p    | 52                            | AG       | 723/2728              | 389/2425   | 855/4448   | 1185/4979  | 890/3136   | Yes              |
| hsa-miR-411-5p    | 20                            | AG       | 720/2037              | 962/3436   | 1076/3573  | 1005/2856  | 793/2379   | Yes              |
| hsa-miR-6503-3p   | 59                            | AG       | 9/16                  | 3/17       | 9/25       | 13/33      | 4/25       | Yes              |
| hsa-miR-664a-5p   | 18                            | AG       | -                     | -          | 9/500      | 7/431      | -          | Yes              |
| hsa-miR-944       | 59                            | AG       | 12/1240               | -          | 12/1870    | 16/1570    | 13/1523    | Yes              |
| hsa-miR-99a-5p    | 13                            | AG       | 628/47478             | 273/34621  | 743/56807  | 759/64519  | 722/51078  | No               |

| miRNA          | Editing position in pre-miRNA | Mismatch | Alternate/Total reads |           |           |           |           | Presence in Seed |
|----------------|-------------------------------|----------|-----------------------|-----------|-----------|-----------|-----------|------------------|
|                |                               |          | SRR330915             | SRR330919 | SRR330921 | SRR330922 | SRR330923 |                  |
| hsa-miR-19a-3p | 63                            | CU       | 10/266                | 15/375    | -         | 6/181     | -         | No               |
| hsa-miR-23b-3p | 60                            | CU       | 9/426                 | 7/247     | 6/238     | -         | -         | Yes              |

|                |    |    |   |   |   |        |          |     |
|----------------|----|----|---|---|---|--------|----------|-----|
| hsa-miR-23a-3p | 47 | CU | - | - | - | 11/935 | -        | Yes |
| hsa-miR-425-5p | 21 | CU | - | - | - | -      | 4/17     | Yes |
| hsa-miR-22-3p  | 60 | CU | - | - | - | -      | 31/10850 | Yes |

## 7. Liver

|                 |                               |          | Alternate/Total reads |           |           |                  |
|-----------------|-------------------------------|----------|-----------------------|-----------|-----------|------------------|
| miRNA           | Editing position in pre-miRNA | Mismatch | SRR039611             | SRR039612 | SRR039613 | Presence in Seed |
| hsa-miR-6503-3p | 59                            | AG       | 26/34                 | 100/123   | 33/49     | Yes              |
| hsa-miR-411-5p  | 20                            | AG       | 21/493                | 33/2521   | 31/1718   | Yes              |
| hsa-miR-214-3p  | 76                            | AG       | 21/1432               | -         | -         | Yes              |
| hsa-miR-664a-5p | 18                            | AG       | 9/334                 | -         | -         | Yes              |
| hsa-miR-200b-3p | 61                            | AG       | 7/442                 | -         | -         | Yes              |

|                |                               |          | Alternate/Total reads |           |           |                  |
|----------------|-------------------------------|----------|-----------------------|-----------|-----------|------------------|
| miRNA          | Editing position in pre-miRNA | Mismatch | SRR039611             | SRR039612 | SRR039613 | Presence in Seed |
| hsa-miR-122-5p | 25                            | CU       | 3061/1630995          | -         | -         | No               |

|                |    |    |            |           |           |     |
|----------------|----|----|------------|-----------|-----------|-----|
| hsa-miR-30d-5p | 16 | CU | 385/59604  | 204/62803 | 132/44398 | No  |
| hsa-miR-99a-5p | 29 | CU | 517/151934 | -         | -         | No  |
| hsa-miR-30a-5p | 15 | CU | 218/38955  | 144/63296 | 60/29445  | No  |
| hsa-miR-30e-5p | 26 | CU | 67/5483    | 52/9465   | -         | No  |
| hsa-miR-30e-5p | 27 | CU | 42/5491    | 62/9464   | 41/6011   | No  |
| hsa-miR-143-3p | 73 | CU | 60/13247   | 44/17800  | -         | No  |
| hsa-miR-21-5p  | 20 | CU | 92/31075   | -         | -         | No  |
| hsa-miR-30a-5p | 16 | CU | 99/39030   | -         | -         | No  |
| hsa-miR-191-5p | 25 | CU | 44/10962   | -         | -         | No  |
| hsa-miR-99a-5p | 25 | CU | 246/152163 | -         | -         | No  |
| hsa-miR-423-3p | 70 | CU | 9/437      | -         | -         | No  |
| hsa-miR-23b-3p | 60 | CU | 4/29       | 11/95     | -         | Yes |
| hsa-miR-99a-5p | 24 | CU | 221/152881 | -         | -         | No  |

### 8. Islets of Langerhans

|                 |                               |          | Alternate/Total reads |           |                  |
|-----------------|-------------------------------|----------|-----------------------|-----------|------------------|
| miRNA           | Editing position in pre-miRNA | Mismatch | SRR871609             | SRR871652 | Presence in Seed |
| hsa-miR-200b-3p | 61                            | AG       | 1558/24252            | 20/255    | Yes              |
| hsa-miR-381-3p  | 52                            | AG       | 15440/32955           | 42/88     | Yes              |
| hsa-miR-151a-3p | 49                            | AG       | 496/19569             | -         | Yes              |
| hsa-miR-411-5p  | 20                            | AG       | 14610/25540           | 62/151    | Yes              |

|                 |    |    |           |        |     |
|-----------------|----|----|-----------|--------|-----|
| hsa-miR-379-5p  | 10 | AG | 960/81163 | 10/998 | Yes |
| hsa-miR-27a-3p  | 56 | AG | 290/25298 | -      | Yes |
| hsa-miR-421     | 54 | AG | 60/90     | 4/11   | Yes |
| hsa-miR-376c-3p | 48 | AG | 50/558    | -      | Yes |
| hsa-miR-99a-5p  | 13 | AG | 53/5313   | -      | No  |
| hsa-miR-148b-5p | 37 | AG | 37/4111   | -      | No  |
| hsa-miR-27a-3p  | 64 | AG | 57/25286  | -      | No  |
| hsa-miR-589-3p  | 66 | AG | 3/10      | -      | Yes |
| hsa-miR-664a-5p | 18 | AG | -         | 5/47   | Yes |

|                 |                               |          | Alternate/Total reads |           |                  |
|-----------------|-------------------------------|----------|-----------------------|-----------|------------------|
| miRNA           | Editing position in pre-miRNA | Mismatch | SRR871609             | SRR871652 | Presence in Seed |
| hsa-miR-200c-3p | 52                            | CU       | 459/249969            | -         | No               |
| hsa-miR-30a-5p  | 16                            | CU       | 584/430597            | -         | No               |
| hsa-miR-409-5p  | 23                            | CU       | 11/475                | -         | No               |
| hsa-miR-106b-5p | 28                            | CU       | 16/2175               | -         | No               |
| hsa-miR-100-5p  | 25                            | CU       | -                     | 6/207     | No               |

## 9. Testes

|       |                               |          | Alternate/Total reads |                  |
|-------|-------------------------------|----------|-----------------------|------------------|
| miRNA | Editing position in pre-miRNA | Mismatch | Stratagene Testes RNA | Presence in Seed |

|                 |    |    |          |     |
|-----------------|----|----|----------|-----|
| hsa-miR-411-5p  | 20 | AG | 518/9697 | Yes |
| hsa-miR-381-3p  | 52 | AG | 79/1424  | Yes |
| hsa-miR-200b-3p | 61 | AG | 60/4171  | Yes |
| hsa-miR-99a-5p  | 13 | AG | 75/12839 | No  |
| hsa-miR-6503-3p | 59 | AG | 8/10     | Yes |
| hsa-miR-151a-3p | 49 | AG | 14/2479  | Yes |

|                |                               |          | Alternate/Total reads |                  |
|----------------|-------------------------------|----------|-----------------------|------------------|
| miRNA          | Editing position in pre-miRNA | Mismatch | Stratagene Testes RNA | Presence in Seed |
| hsa-miR-99a-5p | 25                            | CU       | 338/12978             | No               |
| hsa-miR-100-5p | 25                            | CU       | 263/87795             | No               |

## 10. Ovary

|                |                               |          | Alternate/Total reads |                  |
|----------------|-------------------------------|----------|-----------------------|------------------|
| miRNA          | Editing position in pre-miRNA | Mismatch | Stratagene Ovary RNA  | Presence in Seed |
| hsa-miR-411-5p | 20                            | AG       | 1372/29528            | Yes              |
| hsa-miR-381-3p | 52                            | AG       | 297/10871             | Yes              |
| hsa-miR-605-3p | 54                            | AG       | 8/11                  | Yes              |
| hsa-miR-99a-5p | 13                            | AG       | 236/123147            | No               |

|                 |    |    |        |     |
|-----------------|----|----|--------|-----|
| hsa-miR-503-5p  | 7  | AG | 15/474 | Yes |
| hsa-miR-664a-5p | 18 | AG | 6/186  | Yes |

|                |                               |          | Alternate/Total reads |                  |
|----------------|-------------------------------|----------|-----------------------|------------------|
| miRNA          | Editing position in pre-miRNA | Mismatch | Stratagene Ovary RNA  | Presence in Seed |
| hsa-miR-99a-5p | 25                            | CU       | 4113/124265           | No               |
| hsa-miR-100-5p | 25                            | CU       | 2516/615128           | No               |
| hsa-miR-29a-3p | 48                            | CU       | 158/45443             | Yes              |
| hsa-miR-33a-5p | 20                            | CU       | 12/392                | No               |
| hsa-miR-451a   | 27                            | CU       | 101/55993             | No               |
| hsa-miR-342-3p | 77                            | CU       | 18/4210               | No               |

### 11. Peripheral Blood Mononuclear Cell (PBMC)

|                 |                               |          | Alternate/Total reads |                  |
|-----------------|-------------------------------|----------|-----------------------|------------------|
| miRNA           | Editing position in pre-miRNA | Mismatch | SRR353657             | Presence in Seed |
| hsa-miR-605-3p  | 54                            | AG       | 75/483                | Yes              |
| hsa-miR-381-3p  | 52                            | AG       | 36/469                | Yes              |
| hsa-miR-6503-3p | 59                            | AG       | 23/96                 | Yes              |
| hsa-miR-411-5p  | 20                            | AG       | 17/1451               | Yes              |
| hsa-miR-421     | 54                            | AG       | 9/840                 | Yes              |

|                |                               |          | Alternate/Total reads |                  |
|----------------|-------------------------------|----------|-----------------------|------------------|
| miRNA          | Editing position in pre-miRNA | Mismatch | SRR353657             | Presence in Seed |
| hsa-miR-29a-3p | 48                            | CU       | 218/108375            | Yes              |
| hsa-miR-425-5p | 21                            | CU       | 6/90                  | Yes              |
| hsa-miR-19a-3p | 63                            | CU       | 28/6870               | No               |

## 12. Frontal cortex (FC)

| miRNA           | Editing position in pre-miRNA | Mismatch | Alternate/Total reads |          |          |           |           |          | Presence in Seed |
|-----------------|-------------------------------|----------|-----------------------|----------|----------|-----------|-----------|----------|------------------|
|                 |                               |          | FC1                   | FC2      | FC3      | FC4       | FC5       | FC6      |                  |
| hsa-let-7d-3p   | 66                            | AG       | 22/2325               | 22/2520  | 19/2308  | 53/9316   | 93/16377  | 16/3010  | Yes              |
| hsa-let-7e-3p   | 57                            | AG       | -                     | 7/264    | 12/252   | 21/1221   | 38/1550   | -        | Yes              |
| hsa-miR-1251-5p | 10                            | AG       | 29/167                | 18/150   | -        | 47/299    | 22/184    | -        | Yes              |
| hsa-miR-1301-3p | 52                            | AG       | 82/1138               | 90/862   | 60/726   | 150/1959  | 235/3126  | 21/330   | Yes              |
| hsa-miR-130a-3p | 56                            | AG       | 52/5612               | 53/5130  | 19/3146  | 80/14544  | 115/12582 | -        | Yes              |
| hsa-miR-148b-5p | 37                            | AG       | -                     | 15/641   | 10/384   | 14/931    | 22/2179   | -        | No               |
| hsa-miR-151a-3p | 49                            | AG       | 347/5326              | 251/5594 | 152/5209 | 365/12914 | 643/25618 | 104/7535 | Yes              |

|                   |    |    |             |             |            |              |              |           |     |
|-------------------|----|----|-------------|-------------|------------|--------------|--------------|-----------|-----|
| hsa-miR-195-3p    | 58 | AG | -           | -           | -          | 7/335        | -            | -         | Yes |
| hsa-miR-200b-3p   | 61 | AG | 7/104       | -           | 5/80       | 12/206       | 28/470       | 10/222    | Yes |
| hsa-miR-203b-3p   | 64 | AG | -           | -           | -          | 23/722       | 13/336       | -         | No  |
| hsa-miR-212-3p    | 73 | AG | -           | -           | -          | -            | 30/6245      | -         | Yes |
| hsa-miR-27a-3p    | 56 | AG | 44/6413     | -           | -          | 63/12077     | 209/18890    | -         | Yes |
| hsa-miR-27b-3p    | 64 | AG | 640/125789  | 467/116181  | 271/124561 | 689/248003   | 1611/695433  | -         | Yes |
| hsa-miR-27b-3p    | 66 | AG | 209/125682  | -           | -          | -            | -            | -         | Yes |
| hsa-miR-301b-3p   | 63 | AG | 16/1155     | 29/769      | 8/517      | 12/1552      | 47/4257      | -         | No  |
| hsa-miR-3157-3p   | 70 | AG | -           | -           | -          | 3/15         | 15/93        | -         | No  |
| hsa-miR-3176      | 74 | AG | -           | -           | -          | -            | 5/84         | -         | No  |
| hsa-miR-337-3p    | 66 | AG | 12/103      | -           | 5/44       | 8/210        | 11/239       | -         | Yes |
| hsa-miR-340-3p    | 70 | AG | 15/1151     | -           | 11/918     | 19/1122      | 54/4607      | -         | No  |
| hsa-miR-3622a-5p  | 29 | AG | -           | -           | -          | -            | 6/126        | -         | No  |
| hsa-miR-3681-5p   | 10 | AG | 15/68       | 11/89       | 7/29       | 19/114       | 13/157       | -         | Yes |
| hsa-miR-374b-3p   | 47 | AG | -           | -           | -          | 10/839       | -            | -         | Yes |
| hsa-miR-376a-1-5p | 9  | AG | 53/488      | 49/469      | 32/269     | 42/627       | 146/1096     | 18/155    | Yes |
| hsa-miR-376a-2-5p | 15 | AG | -           | -           | -          | 5/16         | -            | -         | Yes |
| hsa-miR-376c-3p   | 48 | AG | 22/735      | 24/410      | 8/159      | 36/1274      | 41/1557      | 6/135     | Yes |
| hsa-miR-377-3p    | 54 | AG | 9/85        | 11/81       | -          | 5/89         | 31/292       | -         | No  |
| hsa-miR-381-3p    | 52 | AG | 1426/16545  | 1552/22201  | 429/11966  | 3440/50981   | 3655/45413   | 399/5964  | Yes |
| hsa-miR-411-5p    | 20 | AG | 15466/56575 | 19457/59822 | 6583/25591 | 28272/110696 | 52809/189959 | 2715/7961 | Yes |
| hsa-miR-421       | 54 | AG | 60/2387     | 65/2432     | 28/2221    | 60/3875      | 161/14868    | 34/4657   | Yes |
| hsa-miR-455-5p    | 32 | AG | -           | 10/497      | -          | -            | 16/1339      | -         | No  |
| hsa-miR-488-3p    | 56 | AG | 23/4916     | -           | -          | 24/6104      | -            | -         | Yes |



|                |    |    |            |            |            |             |             |           |     |
|----------------|----|----|------------|------------|------------|-------------|-------------|-----------|-----|
| hsa-miR-497-5p | 25 | AG | -          | -          | -          | -           | 27/7777     | -         | Yes |
| hsa-miR-539-5p | 18 | AG | 160/7513   | 95/4580    | 67/2821    | 58/2574     | 221/9138    | 16/728    | No  |
| hsa-miR-589-3p | 66 | AG | 13/36      | 15/27      | 8/15       | 10/28       | 31/88       | -         | Yes |
| hsa-miR-598-3p | 62 | AG | 32/8449    | 58/11524   | 39/7137    | 162/37718   | 168/35763   | 19/2900   | Yes |
| hsa-miR-605-5p | 18 | AG | -          | -          | -          | 3/16        | -           | -         | Yes |
| hsa-miR-641-5p | 18 | AG | 4/69       | 6/130      | 5/92       | 23/368      | 60/761      | 8/158     | Yes |
| hsa-miR-641-5p | 17 | AG | -          | -          | -          | 11/368      | -           | -         | Yes |
| hsa-miR-889-3p | 62 | AG | 79/9686    | 95/15131   | 68/11265   | 91/20109    | 267/37721   | -         | No  |
| hsa-miR-99a-5p | 13 | AG | 2197/54508 | 2639/56674 | 1095/25304 | 3473/125115 | 3484/152194 | 899/45172 | No  |
| hsa-miR-99b-3p | 47 | AG | 30/734     | 51/1040    | 32/640     | 64/2076     | 105/3359    | 10/666    | Yes |

| miRNA           | Editing position in pre-miRNA | Mismatch | Alternate/Total reads |             |                |                 |                  |                 | Presence in Seed |
|-----------------|-------------------------------|----------|-----------------------|-------------|----------------|-----------------|------------------|-----------------|------------------|
|                 |                               |          | FC1                   | FC2         | FC3            | FC4             | FC5              | FC6             |                  |
| hsa-miR-100-5p  | 25                            | CU       | 1560/12705<br>9       | 2057/191200 | 1521/9393<br>9 | 8077/68800<br>0 | 13794/76644<br>9 | 3514/62418<br>4 | No               |
| hsa-miR-99a-5p  | 25                            | CU       | 1396/56463            | 1371/59728  | 761/26855      | 3504/13223<br>7 | 5547/163318      | 1223/46977      | No               |
| hsa-miR-125a-5p | 25                            | CU       | 212/105200            | 251/121339  | 342/13617<br>2 | 367/219997      | 709/379422       | -               | No               |
| hsa-miR-99b-5p  | 19                            | CU       | 440/285723            | -           | -              | -               | 2147/123640<br>8 | -               | No               |

|                   |    |    |         |          |       |            |            |          |     |
|-------------------|----|----|---------|----------|-------|------------|------------|----------|-----|
| hsa-miR-374b-5p   | 22 | CU | 29/4098 | 17/3760  | -     | 33/9652    | 76/25402   | -        | No  |
| hsa-miR-409-5p    | 23 | CU | 8/440   | -        | -     | -          | 21/828     | -        | No  |
| hsa-miR-33a-5p    | 20 | CU | -       | 9/759    | 7/300 | -          | 25/2243    | 20/1088  | No  |
| hsa-miR-29a-3p    | 48 | CU | -       | 94/53669 | -     | 221/107639 | 396/230107 | 80/38306 | Yes |
| hsa-miR-106b-5p   | 28 | CU | -       | -        | 9/718 | -          | -          | -        | No  |
| hsa-miR-1296-3p   | 74 | CU | -       | -        | -     | 8/78       | 7/117      | -        | No  |
| hsa-miR-330-3p    | 74 | CU | -       | -        | -     | 15/1392    | 27/3792    | -        | No  |
| hsa-miR-769-5p    | 38 | CU | -       | -        | -     | 271/177920 | -          | -        | No  |
| hsa-miR-181c-3p   | 75 | CU | -       | -        | -     | 50/18463   | -          | -        | No  |
| hsa-miR-598-3p    | 75 | CU | -       | -        | -     | 80/37689   | -          | -        | No  |
| hsa-miR-204-5p    | 43 | CU | -       | -        | -     | -          | 360/196734 | -        | No  |
| hsa-miR-34a-5p    | 36 | CU | -       | -        | -     | -          | 106/43297  | -        | No  |
| hsa-miR-491-5p    | 26 | CU | -       | -        | -     | -          | 18/1478    | -        | No  |
| hsa-miR-219a-2-5p | 33 | CU | -       | -        | -     | -          | 12/780     | -        | No  |
| hsa-miR-375       | 50 | CU | -       | -        | -     | -          | 10/819     | -        | No  |

### 13. Corpus Callosum (CC)

| miRNA         | Editing position in pre-miRNA | Mismatch | Alternate/Total reads |          |     |         |          |         | Presence in Seed |
|---------------|-------------------------------|----------|-----------------------|----------|-----|---------|----------|---------|------------------|
|               |                               |          | CC1                   | CC2      | CC3 | CC4     | CC5      | CC6     |                  |
| hsa-let-7d-3p | 66                            | AG       | -                     | 38/11774 | -   | 34/6945 | 63/20738 | 27/5973 | Yes              |

|                   |    |    |           |                 |               |             |                 |           |     |
|-------------------|----|----|-----------|-----------------|---------------|-------------|-----------------|-----------|-----|
| hsa-miR-1251-5p   | 10 | AG | 13/73     | 25/235          | -             | -           | 10/76           | 11/84     | Yes |
| hsa-miR-1301-3p   | 52 | AG | 15/414    | 93/1507         | 15/324        | 33/903      | 72/2286         | 28/663    | Yes |
| hsa-miR-130a-3p   | 56 | AG | 22/2003   | 58/5995         | -             | 22/4781     | 39/6805         | 33/2618   | Yes |
| hsa-miR-148b-5p   | 37 | AG | -         | 15/1824         | -             | 11/1142     | 17/3241         | -         | No  |
| hsa-miR-151a-3p   | 49 | AG | 95/7157   | 339/23583       | 48/6195       | 238/16990   | 287/27145       | 158/13143 | Yes |
| hsa-miR-200b-3p   | 61 | AG | -         | 12/551          | 15/148        | 11/142      | 34/605          | -         | Yes |
| hsa-miR-27a-3p    | 56 | AG | 68/7367   | -               | -             | 55/7810     | 152/13524       | -         | Yes |
| hsa-miR-301b-3p   | 63 | AG | -         | 21/2276         | -             | 17/1678     | -               | -         | No  |
| hsa-miR-3157-3p   | 70 | AG | -         | 9/63            | 5/21          | -           | 9/195           | -         | No  |
| hsa-miR-337-3p    | 66 | AG | -         | -               | -             | 5/127       | -               | -         | Yes |
| hsa-miR-3622a-5p  | 29 | AG | -         | -               | -             | 5/104       | -               | -         | No  |
| hsa-miR-3681-5p   | 10 | AG | -         | 7/31            | -             | 41/112      | -               | -         | Yes |
| hsa-miR-3687      | 42 | AG | -         | -               | -             | -           | 4/64            | -         | Yes |
| hsa-miR-376a-1-5p | 9  | AG | 5/94      | 28/457          | 4/29          | 30/377      | 36/263          | 17/191    | Yes |
| hsa-miR-376c-3p   | 48 | AG | 12/186    | 15/690          | -             | 12/735      | 8/490           | 12/216    | Yes |
| hsa-miR-377-3p    | 54 | AG | -         | 9/94            | -             | 7/73        | 8/87            | -         | No  |
| hsa-miR-381-3p    | 52 | AG | 389/3881  | 1477/19133      | 100/2269      | 2196/48928  | 1199/17047      | 710/9762  | Yes |
| hsa-miR-411-5p    | 20 | AG | 2806/8095 | 11715/3720<br>8 | 1065/352<br>5 | 17374/64764 | 16588/5889<br>2 | 3633/9916 | Yes |
| hsa-miR-421       | 54 | AG | 42/4340   | 102/14963       | 23/4276       | 77/10098    | 180/34945       | 37/7013   | Yes |
| hsa-miR-4731-3p   | 48 | AG | -         | 9/45            | -             | 6/29        | 11/47           | 4/17      | Yes |
| hsa-miR-513c-5p   | 20 | AG | -         | -               | -             | -           | 7/78            | -         | Yes |
| hsa-miR-539-5p    | 18 | AG | 7/454     | 60/4119         | 8/400         | 27/2073     | 102/5671        | 27/1589   | No  |
| hsa-miR-589-3p    | 66 | AG | 7/35      | 31/82           | 6/17          | 3/13        | 33/122          | -         | Yes |

|                |    |    |           |            |          |            |            |           |     |
|----------------|----|----|-----------|------------|----------|------------|------------|-----------|-----|
| hsa-miR-589-3p | 65 | AG | -         | -          | -        | -          | 6/122      | -         | Yes |
| hsa-miR-598-3p | 62 | AG | 21/3692   | 43/10362   | -        | 51/21976   | 43/14463   | 21/5618   | Yes |
| hsa-miR-624-5p | 23 | AG | -         | -          | -        | -          | 6/47       | -         | Yes |
| hsa-miR-641-5p | 18 | AG | 9/122     | 41/597     | 7/123    | 34/410     | 60/1079    | 14/192    | Yes |
| hsa-miR-641-5p | 17 | AG | -         | 11/596     | -        | -          | -          | -         | Yes |
| hsa-miR-889-3p | 62 | AG | 14/1779   | 58/9392    | -        | 43/16870   | 48/11670   | 21/5066   | No  |
| hsa-miR-99a-5p | 13 | AG | 570/48331 | 3278/16698 | 449/3321 | 1204/78510 | 1992/20149 | 1319/8335 | No  |
|                |    |    |           | 8          | 6        |            | 9          | 5         |     |
| hsa-miR-99b-3p | 47 | AG | 10/704    | 53/2267    | 7/408    | 39/1929    | 39/2467    | 20/1395   | Yes |

| miRNA           | Editing position in pre-miRNA | Mismatch | Alternate/Total reads |               |             |              |               |              | Presence in Seed |
|-----------------|-------------------------------|----------|-----------------------|---------------|-------------|--------------|---------------|--------------|------------------|
|                 |                               |          | CC1                   | CC2           | CC3         | CC4          | CC5           | CC6          |                  |
| hsa-miR-99a-5p  | 25                            | CU       | 2224/50196            | 4470/174154   | 1389/34018  | 3354/83329   | 11307/214715  | 2913/86727   | No               |
| hsa-miR-100-5p  | 25                            | CU       | 5220/346229           | 20706/2449487 | 6425/777728 | 16732/634301 | 40802/3215205 | 7179/1508761 | No               |
| hsa-miR-204-5p  | 43                            | CU       | 120/40768             | 228/105639    | -           | 234/128599   | 301/157732    | 92/43706     | No               |
| hsa-miR-99b-5p  | 19                            | CU       | 441/283342            | -             | -           | 1070/608728  | 4243/2688957  | -/-          | No               |
| hsa-miR-374b-5p | 22                            | CU       | 36/10178              | 61/25436      | -           | 36/12545     | 74/29404      | 40/13524     | No               |
| hsa-miR-33a-5p  | 20                            | CU       | 10/889                | 30/3379       | -           | -            | 42/1369       | 20/1911      | No               |
| hsa-miR-29a-3p  | 48                            | CU       | -                     | 162/101083    | 38/15474    | 131/57708    | 313/154702    | 71/36329     | Yes              |
| hsa-miR-23b-3p  | 60                            | CU       | -                     | 10/977        | -           | 9/374        | -             | 8/352        | Yes              |

|                   |    |    |   |         |   |            |            |         |     |
|-------------------|----|----|---|---------|---|------------|------------|---------|-----|
| hsa-miR-219a-2-5p | 33 | CU | - | 15/2756 | - | -          | 19/1417    | 10/1143 | No  |
| hsa-miR-421       | 50 | CU | - | 4/53    | - | -          | -          | -       | Yes |
| hsa-miR-125a-5p   | 25 | CU | - | -       | - | 354/116818 | 612/488619 | -       | No  |
| hsa-miR-100-5p    | 17 | CU | - | -       | - | 855/618595 | -          | -       | Yes |
| hsa-miR-598-5p    | 33 | CU | - | -       | - | 4/21       | -          | -       | No  |
| hsa-miR-106b-5p   | 28 | CU | - | -       | - | 18/3256    | 31/7834    | -       | No  |
| hsa-miR-181c-3p   | 75 | CU | - | -       | - | 33/10436   | -          | -       | No  |
| hsa-miR-19a-3p    | 63 | CU | - | -       | - | 18/3410    | -          | -       | No  |
| hsa-miR-1307-5p   | 56 | CU | - | -       | - | 40/15608   | -          | -       | No  |
| hsa-miR-425-5p    | 25 | CU | - | -       | - | -          | 9/33       | -       | No  |
| hsa-miR-323b-3p   | 60 | CU | - | -       | - | -          | 16/2040    | -       | No  |
| hsa-miR-598-3p    | 75 | CU | - | -       | - | -          | 43/14518   | -       | No  |
| hsa-miR-138-1-5p  | 25 | CU | - | -       | - | -          | 7/237      | -       | Yes |
| hsa-miR-5010-5p   | 31 | CU | - | -       | - | -          | 4/23       | -       | No  |

**Supplemental Table S3: Novel A-to-I editing events identified in our study**

| miRNA            | Position in precursor | Position in seed |
|------------------|-----------------------|------------------|
| hsa-mir-148b-5p  | 37                    | No               |
| hsa-mir-203b-3p  | 64                    | No               |
| hsa-mir-3622a-5p | 29                    | No               |
| hsa-mir-4731-3p  | 48                    | Seed             |
| hsa-mir-605-3p   | 54                    | Seed             |
| hsa-mir-944      | 59                    | Seed             |

**Supplemental Table S4: Intra-individual variation (FC vs CC) for A-to-I editing**

**hsa-let-7e edited in four FC but none of the CC samples**

| miRNA      | Location inside pre-miRNA | Seed | Alternate/Total reads |       |        |         |         |     |
|------------|---------------------------|------|-----------------------|-------|--------|---------|---------|-----|
|            |                           |      | FC1                   | FC2   | FC3    | FC4     | FC5     | FC6 |
| hsa-let-7e | 57                        | Yes  | -                     | 7/264 | 12/252 | 21/1221 | 38/1550 | -   |

**Target prediction done by Target Scan Custom**

| Targets of unedited let-7e | Targets of edited let-7e |
|----------------------------|--------------------------|
| PHOX2B                     | FOXG1                    |
| EDEM3                      | GATA2                    |
| PURB                       | PICK1                    |
| BSN                        |                          |
| NFASC                      |                          |

**miRNAs edited in FC and not in CC samples (present in at least 2 FC samples)**

| miRNA        | Location inside pre-miRNA | Seed | Alternate/Total reads |            |            |            |             |     |
|--------------|---------------------------|------|-----------------------|------------|------------|------------|-------------|-----|
|              |                           |      | FC1                   | FC2        | FC3        | FC4        | FC5         | FC6 |
| hsa-miR-203b | 64                        | No   | -                     | -          | -          | 23/722     | 13/336      | -   |
| hsa-miR-27b  | 64                        | Yes  | 640/125789            | 467/116181 | 271/124561 | 689/248003 | 1611/695433 | -   |
| hsa-miR-340  | 70                        | No   | 15/1151               |            | 11/918     | 19/1122    | 54/4607     | -   |
| hsa-miR-455  | 32                        | No   | -                     | 10/497     | -          | -          | -           | -   |
| hsa-miR-488  | 56                        | Yes  | 23/4916               | -          | -          | 24/6104    | -           | -   |

**hsa-miR-4731 edited in four CC but none of the FC samples**

| miRNA        | Location inside pre-miRNA | Seed | Alternate/Total reads |      |     |      |       |      |
|--------------|---------------------------|------|-----------------------|------|-----|------|-------|------|
|              |                           |      | CC1                   | CC2  | CC3 | CC4  | CC5   | CC6  |
| hsa-miR-4731 | 48                        | Yes  | -                     | 9/45 | -   | 6/29 | 11/47 | 4/17 |

**Supplemental Table S5A: Two- and three dimensional structural prediction analysis for pre-miRNAs in the unedited and edited (A-to-I) forms**

| pre-mirna    | Edited position in pre-mirna | Unedited (MFE in kcal/mol) | Edited (MFE in kcal/mol) | 2D- $\Delta\Delta G$ | Unedited (MFE in kcal/mol) | Edited (MFE in kcal/mol) | 3D- $\Delta\Delta G$ | Edited miRNA motif | Motif in the fold-back structure |
|--------------|------------------------------|----------------------------|--------------------------|----------------------|----------------------------|--------------------------|----------------------|--------------------|----------------------------------|
| pre-mir-200b | 61                           | -42.5                      | -49.2                    | -6.7                 |                            |                          |                      | UAC                | GCA                              |
| pre-mir-3176 | 74                           | -51.5                      | -58.2                    | -6.7                 |                            |                          |                      | UAC                | GCA                              |
| pre-mir-589  | 66                           | -42                        | -48.7                    | -6.7                 | -67.11                     | -64.21                   | 2.9                  | AAC                | GCU                              |

|                |    |       |       |      |        |        |        |     |     |
|----------------|----|-------|-------|------|--------|--------|--------|-----|-----|
| pre-mir-148b   | 37 | -30.7 | -37.4 | -6.7 |        |        |        | UAC | GCA |
| pre-mir-889    | 62 | -25.2 | -31.9 | -6.7 |        |        |        | AAC | GCU |
| pre-let-7d     | 66 | -42.7 | -49.4 | -6.7 | -76.19 | -78.42 | -2.23  | UAC | GCA |
| pre-mir-455    | 32 | -41.6 | -48.3 | -6.7 |        |        |        | UAC | GCA |
| pre-mir-3157   | 70 | -51.5 | -58.1 | -6.6 | -81.65 | -81.76 | -0.11  | UAG | CCA |
| pre-mir-376a-1 | 9  | -18.5 | -25.1 | -6.6 | -48.36 | -49.23 | -0.87  | UAG | CCA |
| pre-mir-376a-2 | 15 | -29   | -35.6 | -6.6 |        |        |        | UAG | CCA |
| pre-mir-377    | 54 | -27.5 | -34.1 | -6.6 | -60.78 | -62.17 | -1.39  | AAG | CCU |
| pre-mir-411    | 20 | -28.6 | -35.2 | -6.6 | -68.87 | -71.41 | -2.54  | UAG | CCA |
| pre-mir-1251   | 10 | -20.8 | -27.4 | -6.6 | -49.46 | -53    | -3.54  | UAG | CCA |
| pre-mir-664a   | 18 | -23.8 | -30.4 | -6.6 |        |        |        | UAG | CCA |
| pre-mir-379    | 10 | -26.3 | -32.9 | -6.6 |        |        |        | UAG | CCA |
| pre-mir-503    | 7  | -42.2 | -48.8 | -6.6 |        |        |        | UAG | CCA |
| pre-mir-1301   | 52 | -45.4 | -51.9 | -6.5 | -58.17 | -71.26 | -13.09 | CAG | CCG |
| pre-mir-99a    | 13 | -39.3 | -45.7 | -6.4 | -73.94 | -75.74 | -1.8   | AAA | UCU |
| pre-mir-488    | 56 | -32.2 | -38.6 | -6.4 |        |        |        | AAA | UCU |
| pre-mir-337    | 66 | -40.5 | -46.7 | -6.2 | -65.75 | -66.88 | -1.13  | UAU | ACA |
| pre-mir-539    | 18 | -27.9 | -34.1 | -6.2 |        |        |        | UAU | ACA |



|              |    |       |       |      |        |        |       |     |     |
|--------------|----|-------|-------|------|--------|--------|-------|-----|-----|
| pre-mir-27a  | 10 | -37.1 | -43.3 | -6.2 |        |        |       | CAG | CCG |
| pre-mir-140  | 38 | -54.6 | -60.8 | -6.2 |        |        |       | UAU | ACA |
| pre-mir-340  | 70 | -36.1 | -42.2 | -6.1 |        |        |       | UAC |     |
| pre-mir-513c | 20 | -34.3 | -39.8 | -5.5 |        |        |       | AAG | UCU |
| pre-mir-24-2 | 18 | -26   | -31.3 | -5.3 |        |        |       | UAC | GUU |
| pre-mir-99b  | 47 | -27.6 | -30.9 | -3.3 |        |        |       | AAG | CUU |
| pre-mir-497  | 25 | -54.1 | -56.9 | -2.8 |        |        |       | CAG | UUA |
| pre-mir-212  | 73 | -50.1 | -52.5 | -2.4 |        |        |       | AAC |     |
| pre-mir-369  | 48 | -27.8 | -29.6 | -1.8 |        |        |       | AAU | UAU |
| pre-mir-6503 | 59 | -62.1 | -62.9 | -0.8 |        |        |       | UAG | CAA |
| pre-mir-605  | 18 | -52.3 | -52.4 | -0.1 |        |        |       | AAA | UUU |
| pre-mir-641  | 17 | -61.4 | -61.5 | -0.1 |        |        |       | AAA | UUU |
| pre-let-7e   | 57 | -36.7 | -36.7 | 0    | -53.89 | -53.65 | 0.24  | UAC | GUA |
| pre-mir-130a | 56 | -42   | -42   | 0    | -81.57 | -81.82 | -0.25 | CAG | CUA |
| pre-mir-195  | 58 | -46.6 | -46.6 | 0    |        |        |       | UAU | AUA |
| pre-mir-203b | 64 | -38.1 | -38.1 | 0    |        |        |       | UAA | UAA |
| pre-mir-27b  | 66 | -49.5 | -49.5 | 0    |        |        |       | CAG | UGG |
| pre-mir-381  | 52 | -35.5 | -35.5 | 0    | -57.6  | -60.4  | -2.8  | UAC | GUA |

|               |    |       |       |     |        |        |       |     |     |
|---------------|----|-------|-------|-----|--------|--------|-------|-----|-----|
| pre-mir-3687  | 42 | -32.9 | -32.9 | 0   |        |        |       | CAG | CGG |
| pre-mir-4731  | 48 | -54.9 | -54.9 | 0   | -71.66 | -71.58 | 0.08  | AAG | CAU |
| pre-mir-100   | 13 | -25.7 | -25.7 | 0   |        |        |       | AAA | UAU |
| pre-mir-944   | 59 | -45.3 | -45.3 | 0   |        |        |       | UAU | AUA |
| pre-mir-598   | 62 | -35.9 | -35.7 | 0.2 |        |        |       | UAC | GUG |
| pre-mir-151a  | 49 | -44.4 | -44.1 | 0.3 | -81.82 | -80.92 | 0.9   | UAG | CUA |
| pre-mir-641   | 18 | -61.4 | -61.1 | 0.3 |        |        |       | AAG | CUU |
| pre-mir-605   | 54 | -52.3 | -52   | 0.3 |        |        |       | AAG | CUU |
| pre-mir-4662a | 8  | -35.5 | -35.2 | 0.3 |        |        |       | UAG | CUA |
| pre-mir-376c  | 48 | -25   | -24.7 | 0.3 |        |        |       | UAG | CUA |
| pre-mir-3681  | 10 | -53.1 | -52.8 | 0.3 | -62.32 | -62.35 | -0.03 | UAG | CUA |
| pre-mir-27a   | 64 | -37.1 | -36.8 | 0.3 | -68.93 | -69.02 | -0.09 | AAG | CUU |
| pre-mir-27b   | 64 | -49.5 | -49.1 | 0.4 |        |        |       | CAC | GUG |
| pre-mir-301b  | 63 | -31.2 | -30.5 | 0.7 |        |        |       | CAA | CUG |
| pre-mir-27a   | 56 | -37.1 | -36.4 | 0.7 |        |        |       | CAG | CUU |
| pre-mir-3622a | 29 | -68.2 | -67.5 | 0.7 |        |        |       | CAG | CUG |
| pre-mir-374b  | 47 | -40.7 | -40   | 0.7 |        |        |       | CAG | CUG |
| pre-mir-214   | 76 | -67   | -66.2 | 0.8 |        |        |       | CAG | UUG |

|             |    |       |       |     |        |        |      |     |     |
|-------------|----|-------|-------|-----|--------|--------|------|-----|-----|
| pre-mir-421 | 54 | -35.1 | -34.3 | 0.8 | -76.79 | -76.27 | 0.52 | CAG | UUG |
| pre-mir-624 | 23 | -54.6 | -53.8 | 0.8 |        |        |      | CAG | UUG |
| pre-mir-589 | 65 | -42   | -41.1 | 0.9 |        |        |      | GAA | CUC |

**Supplemental Table S5B: Two-dimensional structural prediction analysis for pre-miRNAs in the unedited and edited (C-to-U) forms**

| miRNA        | Edited position in pre-mirna | Unedited (MFE in kcal/mol) | Edited (MFE in kcal/mol) | 2D- $\Delta\Delta G$ |
|--------------|------------------------------|----------------------------|--------------------------|----------------------|
| pre-mir-100  | 17                           | -25.7                      | -30                      | -4.3                 |
| pre-mir-122  | 25                           | -45.7                      | -50                      | -4.3                 |
| pre-mir-491  | 26                           | -48                        | -50.7                    | -2.7                 |
| pre-mir-30d  | 16                           | -28.1                      | -29.2                    | -1.1                 |
| pre-mir-181c | 75                           | -45.2                      | -46                      | -0.8                 |
| Pre-mir-26b  | 23                           | -39.1                      | -39.4                    | -0.3                 |
| pre-mir-191  | 25                           | -46.8                      | -46.8                    | 0                    |
| pre-mir-375  | 50                           | -26.8                      | -26.8                    | 0                    |
| pre-mir-5010 | 31                           | -43.4                      | -43.4                    | 0                    |
| pre-mir-598  | 33                           | -36.1                      | -36.1                    | 0                    |
| pre-mir-99a  | 24                           | -39.5                      | -39.5                    | 0                    |
| pre-mir-425  | 25                           | -34.5                      | -33.6                    | 0.9                  |
| pre-mir-30a  | 16                           | -37.2                      | -36.3                    | 0.9                  |
| pre-mir-330  | 74                           | -45                        | -44                      | 1                    |
| pre-mir-99a  | 29                           | -39.5                      | -38.4                    | 1.1                  |
| pre-mir-181c | 36                           | -45.2                      | -43.7                    | 1.5                  |
| pre-mir-208a | 54                           | -32.4                      | -30.8                    | 1.6                  |
| pre-mir-23a  | 47                           | -33.3                      | -31.7                    | 1.6                  |
| pre-mir-106b | 28                           | -43.2                      | -41.6                    | 1.6                  |
| pre-mir-152  | 55                           | -47.2                      | -45.6                    | 1.6                  |
| pre-mir-30e  | 27                           | -51.8                      | -50.1                    | 1.7                  |
| pre-mir-769  | 38                           | -60.8                      | -59.1                    | 1.7                  |
| pre-mir-200c | 52                           | -30.8                      | -29.1                    | 1.7                  |

|                |    |       |       |     |
|----------------|----|-------|-------|-----|
| pre-mir-204    | 43 | -42   | -40.3 | 1.7 |
| pre-mir-208b   | 56 | -31.4 | -29.6 | 1.8 |
| pre-mir-425    | 21 | -34.5 | -32.7 | 1.8 |
| pre-mir-323b   | 60 | -40.2 | -38.4 | 1.8 |
| pre-mir-19a    | 63 | -38.7 | -36.7 | 2   |
| pre-mir-342    | 77 | -47.7 | -45.7 | 2   |
| pre-mir-409    | 23 | -35.9 | -33.7 | 2.2 |
| pre-mir-23b    | 60 | -35.5 | -33.3 | 2.2 |
| pre-mir-421    | 50 | -35   | -32.8 | 2.2 |
| pre-mir-598    | 75 | -36.1 | -33.9 | 2.2 |
| pre-mir-99a    | 25 | -39.5 | -37.3 | 2.2 |
| pre-mir-99b    | 19 | -27.6 | -25.4 | 2.2 |
| pre-mir-138-1  | 25 | -58.3 | -56   | 2.3 |
| pre-mir-143    | 73 | -51   | -48.7 | 2.3 |
| pre-mir-22     | 60 | -39.8 | -37.5 | 2.3 |
| pre-mir-451a   | 27 | -43.4 | -41.1 | 2.3 |
| pre-mir-29a    | 48 | -24.6 | -22.3 | 2.3 |
| pre-mir-21     | 20 | -34.6 | -32.3 | 2.3 |
| pre-mir-100    | 25 | -25.7 | -23.3 | 2.4 |
| pre-mir-30a    | 15 | -37.2 | -34.8 | 2.4 |
| pre-mir-34a    | 36 | -47.2 | -44.8 | 2.4 |
| pre-mir-125a   | 25 | -44.2 | -41.7 | 2.5 |
| pre-mir-374b   | 22 | -40.3 | -37.7 | 2.6 |
| pre-mir-451a   | 26 | -43.4 | -40.8 | 2.6 |
| pre-mir-1307   | 56 | -53.8 | -51.1 | 2.7 |
| pre-mir-423    | 70 | -48.8 | -46.1 | 2.7 |
| pre-mir-23b    | 67 | -35.5 | -32.8 | 2.7 |
| pre-mir-30e    | 26 | -51.8 | -48.9 | 2.9 |
| pre-mir-99a    | 17 | -39.5 | -36.6 | 2.9 |
| pre-mir-1296   | 74 | -50.5 | -47.5 | 3   |
| pre-mir-1295a  | 57 | -49.2 | -45   | 4.2 |
| pre-mir-33a    | 20 | -35.6 | -31.2 | 4.4 |
| pre-mir-219a-2 | 33 | -49.3 | -44.4 | 4.9 |

**Supplemental Table S6A: DESeq2 analysis of differential miRNA expression in 5 GBM compared to 6 FC samples**

**293 miRNAs downregulated in GBM**

| miRNA name        | log2FoldChange | padj     |
|-------------------|----------------|----------|
| hsa-mir-876-5p    | -9.027999076   | 3.72E-22 |
| hsa-mir-876-3p    | -7.866142814   | 3.44E-16 |
| hsa-mir-873-5p    | -7.55774423    | 9.23E-55 |
| hsa-mir-577       | -7.475815624   | 1.8E-17  |
| hsa-mir-873-3p    | -7.395570204   | 1.1E-24  |
| hsa-mir-490-5p    | -7.244154819   | 2.03E-14 |
| hsa-mir-490-3p    | -7.224225136   | 2.97E-28 |
| hsa-mir-539-5p    | -6.832768514   | 2.19E-33 |
| hsa-mir-139-3p    | -6.580859231   | 1.94E-44 |
| hsa-mir-1298-3p   | -6.506883138   | 3.16E-19 |
| hsa-mir-1264      | -6.41395177    | 3.23E-13 |
| hsa-mir-219a-2-5p | -6.403732865   | 2.23E-09 |
| hsa-mir-3943      | -6.154899291   | 1.09E-24 |
| hsa-mir-383-3p    | -6.038617904   | 9.77E-10 |
| hsa-mir-433-3p    | -6.02225047    | 1.58E-20 |
| hsa-mir-1298-5p   | -5.863129805   | 1.81E-12 |
| hsa-mir-6841-5p   | -5.862070992   | 1.34E-08 |
| hsa-mir-203b-3p   | -5.843248294   | 8.98E-13 |
| hsa-mir-522-3p    | -5.680330609   | 5.32E-09 |
| hsa-mir-338-3p    | -5.615122346   | 1.98E-15 |
| hsa-mir-1224-5p   | -5.587571546   | 5.8E-30  |
| hsa-mir-1912      | -5.47901767    | 3.11E-08 |
| hsa-mir-137       | -5.454686882   | 4.17E-26 |
| hsa-mir-139-5p    | -5.446847498   | 1.24E-52 |
| hsa-mir-412-5p    | -5.288113623   | 9.24E-05 |
| hsa-mir-3663-3p   | -5.101641283   | 1.79E-06 |
| hsa-mir-6794-3p   | -4.907720004   | 6.67E-08 |
| hsa-mir-1911-5p   | -4.885086056   | 1.24E-05 |
| hsa-mir-203a-5p   | -4.646557941   | 7.5E-10  |
| hsa-mir-1250-5p   | -4.602035165   | 6.41E-09 |
| hsa-mir-504-3p    | -4.454854114   | 7.46E-05 |
| hsa-mir-770-5p    | -4.416929605   | 1.57E-12 |
| hsa-mir-338-5p    | -4.383844333   | 2.01E-08 |
| hsa-mir-504-5p    | -4.359551508   | 2.53E-09 |
| hsa-mir-128-1-5p  | -4.311099591   | 1.16E-16 |

|                  |              |          |
|------------------|--------------|----------|
| hsa-mir-6881-3p  | -4.237147518 | 0.000118 |
| hsa-mir-889-3p   | -4.186715941 | 1.77E-12 |
| hsa-mir-7158-5p  | -4.130890233 | 0.001044 |
| hsa-mir-4501     | -4.090076139 | 0.000311 |
| hsa-mir-1249-5p  | -4.06296066  | 3.93E-21 |
| hsa-mir-383-5p   | -4.034646639 | 8.32E-06 |
| hsa-mir-1286     | -4.003384938 | 1.45E-10 |
| hsa-mir-431-3p   | -3.928030672 | 2.34E-07 |
| hsa-mir-767-3p   | -3.914104949 | 5.71E-05 |
| hsa-mir-767-5p   | -3.910151623 | 1.93E-12 |
| hsa-mir-6507-5p  | -3.883593703 | 8.05E-06 |
| hsa-mir-1252-3p  | -3.875245681 | 0.002617 |
| hsa-mir-1252-5p  | -3.857867881 | 1.34E-08 |
| hsa-mir-518e-3p  | -3.8269765   | 0.001732 |
| hsa-mir-668-3p   | -3.795620496 | 4.45E-07 |
| hsa-mir-5680     | -3.781870403 | 7.6E-10  |
| hsa-mir-433-5p   | -3.774690548 | 5.98E-11 |
| hsa-mir-3938     | -3.77007807  | 5.85E-09 |
| hsa-mir-1296-5p  | -3.764380953 | 2.73E-15 |
| hsa-mir-410-3p   | -3.709754737 | 2.64E-09 |
| hsa-mir-656-5p   | -3.687994202 | 0.000286 |
| hsa-mir-184      | -3.683985736 | 1.47E-10 |
| hsa-mir-3200-3p  | -3.673893274 | 1.49E-24 |
| hsa-mir-448      | -3.673736952 | 0.002007 |
| hsa-mir-323b-3p  | -3.669751625 | 6.03E-07 |
| hsa-mir-124-1-3p | -3.650857592 | 0.003464 |
| hsa-mir-128-2-5p | -3.632501562 | 5.04E-07 |
| hsa-mir-7-2-5p   | -3.619477776 | 0.009105 |
| hsa-mir-4671-3p  | -3.608072907 | 3.63E-06 |
| hsa-mir-154-3p   | -3.576495578 | 1.61E-11 |
| hsa-mir-874-3p   | -3.547345757 | 1.98E-15 |
| hsa-mir-323a-5p  | -3.539278754 | 4.16E-07 |
| hsa-mir-330-5p   | -3.532299146 | 7.15E-38 |
| hsa-mir-432-3p   | -3.531544018 | 1.4E-10  |
| hsa-mir-598-5p   | -3.506106497 | 2.74E-06 |
| hsa-mir-541-3p   | -3.500543128 | 1.56E-05 |
| hsa-mir-5187-5p  | -3.498285172 | 0.000133 |
| hsa-mir-370-5p   | -3.467542898 | 3.61E-08 |
| hsa-mir-496      | -3.46215769  | 1.06E-08 |
| hsa-mir-7-1-5p   | -3.452402411 | 0.002819 |
| hsa-mir-487b-5p  | -3.441981484 | 9.31E-09 |

|                   |              |          |
|-------------------|--------------|----------|
| hsa-mir-885-5p    | -3.395950492 | 0.010855 |
| hsa-mir-642a-3p   | -3.383086068 | 0.017726 |
| hsa-mir-330-3p    | -3.346447938 | 2.77E-32 |
| hsa-mir-7855-5p   | -3.291415086 | 0.016843 |
| hsa-mir-211-5p    | -3.273830018 | 0.009147 |
| hsa-mir-4446-5p   | -3.265372565 | 0.006977 |
| hsa-mir-29c-5p    | -3.261006517 | 2.48E-07 |
| hsa-mir-1231      | -3.253392619 | 0.001271 |
| hsa-mir-758-5p    | -3.238841775 | 3.27E-06 |
| hsa-mir-889-5p    | -3.233059058 | 5.95E-07 |
| hsa-mir-6877-3p   | -3.214982901 | 0.000855 |
| hsa-mir-513c-5p   | -3.21231178  | 0.013015 |
| hsa-mir-2682-5p   | -3.210508548 | 2.55E-06 |
| hsa-mir-518b      | -3.193923675 | 2.1E-05  |
| hsa-mir-1277-3p   | -3.173881672 | 0.003292 |
| hsa-mir-495-3p    | -3.167733222 | 1.47E-07 |
| hsa-mir-4743-5p   | -3.166577793 | 0.00264  |
| hsa-mir-769-3p    | -3.163844413 | 2.21E-20 |
| hsa-mir-485-3p    | -3.137220851 | 7.37E-06 |
| hsa-mir-7-3-5p    | -3.13534517  | 0.040057 |
| hsa-mir-487a-5p   | -3.110103831 | 8.08E-06 |
| hsa-mir-4729      | -3.109277334 | 0.029904 |
| hsa-mir-487b-3p   | -3.100355228 | 7.48E-07 |
| hsa-mir-129-2-5p  | -3.099399178 | 0.023068 |
| hsa-mir-584       | -3.097641558 | 2.68E-05 |
| hsa-mir-519a-1-5p | -3.090082747 | 0.035621 |
| hsa-mir-769-5p    | -3.085194037 | 3.09E-15 |
| hsa-mir-4446-3p   | -3.072497479 | 7.91E-07 |
| hsa-mir-127-3p    | -3.058947893 | 5.9E-10  |
| hsa-mir-4671-5p   | -3.057150103 | 0.007881 |
| hsa-mir-656-3p    | -3.054632126 | 1.5E-08  |
| hsa-mir-323a-3p   | -3.043070689 | 8.05E-06 |
| hsa-mir-491-5p    | -3.042641844 | 1.71E-08 |
| hsa-mir-1197      | -3.014903827 | 1.83E-06 |
| hsa-mir-487a-3p   | -2.987337812 | 8.71E-06 |
| hsa-mir-1179      | -2.943466048 | 3.01E-10 |
| hsa-mir-299-5p    | -2.942612197 | 5.49E-06 |
| hsa-mir-380-5p    | -2.930504672 | 0.000221 |
| hsa-mir-410-5p    | -2.912962    | 0.000585 |
| hsa-mir-3663-5p   | -2.883542306 | 0.028082 |
| hsa-mir-508-3p    | -2.871576643 | 5.41E-06 |

|                  |              |          |
|------------------|--------------|----------|
| hsa-mir-132-3p   | -2.852509788 | 7.33E-09 |
| hsa-mir-132-5p   | -2.818081821 | 2.26E-07 |
| hsa-mir-5088-3p  | -2.791827875 | 0.075778 |
| hsa-mir-346      | -2.787185325 | 1.98E-09 |
| hsa-mir-642a-5p  | -2.782965153 | 0.00476  |
| hsa-mir-3167     | -2.76595738  | 0.029904 |
| hsa-mir-411-5p   | -2.760367535 | 6.26E-07 |
| hsa-mir-491-3p   | -2.756725365 | 1.81E-07 |
| hsa-mir-539-3p   | -2.749383177 | 1.06E-06 |
| hsa-mir-670-5p   | -2.73996814  | 0.028637 |
| hsa-mir-935      | -2.726220732 | 6.09E-08 |
| hsa-mir-518c-3p  | -2.71603013  | 0.060933 |
| hsa-mir-2682-3p  | -2.70481452  | 0.000423 |
| hsa-mir-127-5p   | -2.673134487 | 6.57E-06 |
| hsa-mir-6516-5p  | -2.6708607   | 7.73E-07 |
| hsa-mir-6786-3p  | -2.670552891 | 1.5E-05  |
| hsa-mir-377-5p   | -2.660617146 | 8.08E-06 |
| hsa-mir-655-3p   | -2.65734661  | 7.52E-06 |
| hsa-mir-519d-3p  | -2.647534885 | 0.082068 |
| hsa-mir-6872-3p  | -2.634381436 | 0.034351 |
| hsa-mir-582-5p   | -2.613229319 | 5.48E-08 |
| hsa-mir-302c-3p  | -2.608460811 | 0.073792 |
| hsa-mir-1296-3p  | -2.603736856 | 1.56E-06 |
| hsa-mir-4701-5p  | -2.600337738 | 0.004516 |
| hsa-mir-1225-5p  | -2.599297458 | 0.013614 |
| hsa-mir-7109-3p  | -2.59285412  | 0.033366 |
| hsa-mir-5191     | -2.578311966 | 0.053953 |
| hsa-mir-362-5p   | -2.576666168 | 0.039036 |
| hsa-mir-3529-5p  | -2.567298608 | 0.092244 |
| hsa-mir-509-3-5p | -2.549918861 | 0.061848 |
| hsa-mir-4520a-3p | -2.549552084 | 0.037649 |
| hsa-mir-6865-3p  | -2.544621201 | 0.001565 |
| hsa-mir-2681-5p  | -2.518832439 | 0.008974 |
| hsa-mir-33a-5p   | -2.517101374 | 7.62E-07 |
| hsa-mir-744-3p   | -2.505605422 | 4.82E-18 |
| hsa-mir-5008-3p  | -2.48155264  | 0.047192 |
| hsa-mir-670-3p   | -2.467604642 | 0.000126 |
| hsa-mir-136-3p   | -2.451247833 | 9.93E-06 |
| hsa-mir-582-3p   | -2.450292708 | 7.65E-08 |
| hsa-mir-101-1-3p | -2.440922695 | 0.013054 |
| hsa-mir-381-5p   | -2.429753819 | 0.000353 |



|                  |              |          |
|------------------|--------------|----------|
| hsa-mir-4525     | -2.427867882 | 0.059995 |
| hsa-mir-4640-5p  | -2.413302242 | 0.061848 |
| hsa-mir-5006-3p  | -2.406337934 | 0.001619 |
| hsa-mir-425-5p   | -2.401501245 | 0.002729 |
| hsa-mir-7156-5p  | -2.388373727 | 0.013614 |
| hsa-mir-33a-3p   | -2.364777042 | 5.51E-05 |
| hsa-mir-29b-2-5p | -2.357209003 | 1.21E-07 |
| hsa-mir-381-3p   | -2.350949709 | 2.47E-05 |
| hsa-mir-4641     | -2.304535286 | 0.055775 |
| hsa-mir-134-3p   | -2.29418199  | 6.58E-05 |
| hsa-mir-382-3p   | -2.290731312 | 6.35E-05 |
| hsa-mir-149-5p   | -2.289317667 | 5.01E-08 |
| hsa-mir-885-3p   | -2.264641621 | 0.00612  |
| hsa-mir-495-5p   | -2.250987556 | 0.00191  |
| hsa-mir-4780     | -2.243435477 | 0.012473 |
| hsa-mir-3120-3p  | -2.235547955 | 0.095213 |
| hsa-mir-5699-5p  | -2.229017588 | 0.000174 |
| hsa-mir-412-3p   | -2.218741033 | 0.022874 |
| hsa-mir-6810-5p  | -2.212331027 | 0.04903  |
| hsa-mir-6860     | -2.210798909 | 0.073666 |
| hsa-mir-485-5p   | -2.205354059 | 0.001933 |
| hsa-mir-379-3p   | -2.18505952  | 0.000133 |
| hsa-mir-138-1-5p | -2.184599158 | 0.000105 |
| hsa-mir-766-3p   | -2.158988307 | 2.02E-06 |
| hsa-mir-543      | -2.143140595 | 0.002124 |
| hsa-mir-342-3p   | -2.139419944 | 2.93E-08 |
| hsa-mir-4798-5p  | -2.117883975 | 0.022874 |
| hsa-mir-499a-5p  | -2.108692418 | 3.91E-07 |
| hsa-mir-1343-3p  | -2.096397768 | 0.000315 |
| hsa-mir-432-5p   | -2.053713019 | 0.002422 |
| hsa-mir-411-3p   | -2.048473082 | 0.000258 |
| hsa-mir-6508-3p  | -2.043216733 | 0.003935 |
| hsa-mir-375      | -2.030774564 | 0.012105 |
| hsa-mir-382-5p   | -2.002183284 | 0.000348 |
| hsa-mir-6864-5p  | -1.999660068 | 0.016993 |
| hsa-mir-598-3p   | -1.989939136 | 0.000127 |
| hsa-mir-1909-5p  | -1.98808198  | 0.044071 |
| hsa-mir-6735-5p  | -1.959591804 | 0.018056 |
| hsa-mir-377-3p   | -1.954478804 | 0.0004   |
| hsa-mir-585-5p   | -1.926155793 | 0.090046 |
| hsa-mir-4515     | -1.906382764 | 0.07512  |

|                  |              |          |
|------------------|--------------|----------|
| hsa-mir-628-5p   | -1.906352744 | 4.9E-12  |
| hsa-mir-874-5p   | -1.895946432 | 0.000922 |
| hsa-mir-33b-5p   | -1.886267091 | 0.028209 |
| hsa-mir-2467-5p  | -1.859650121 | 2.67E-08 |
| hsa-mir-655-5p   | -1.846528295 | 0.055746 |
| hsa-mir-6733-5p  | -1.77024162  | 0.002211 |
| hsa-mir-103a-2   | -1.76880401  | 0.000195 |
| hsa-mir-190a-5p  | -1.767451897 | 1.35E-05 |
| hsa-mir-154-5p   | -1.75864733  | 0.001917 |
| hsa-mir-299-3p   | -1.754898637 | 0.010141 |
| hsa-mir-758-3p   | -1.750002282 | 0.007901 |
| hsa-mir-136-5p   | -1.747307295 | 0.001618 |
| hsa-mir-30a-5p   | -1.745540787 | 4.04E-05 |
| hsa-mir-3617-5p  | -1.721374638 | 0.019888 |
| hsa-mir-541-5p   | -1.716807732 | 0.004886 |
| hsa-mir-760      | -1.712902642 | 0.000189 |
| hsa-mir-6734-5p  | -1.711751982 | 0.050271 |
| hsa-mir-212-5p   | -1.709278428 | 0.000739 |
| hsa-mir-212-3p   | -1.705736951 | 0.001025 |
| hsa-mir-940      | -1.69458573  | 6.59E-05 |
| hsa-mir-5699-3p  | -1.689590731 | 0.08281  |
| hsa-mir-744-5p   | -1.677048759 | 7.94E-09 |
| hsa-mir-30d-5p   | -1.671631382 | 6.92E-12 |
| hsa-mir-153-2-5p | -1.670621956 | 0.004137 |
| hsa-mir-3177-5p  | -1.655186843 | 0.043964 |
| hsa-mir-5010-3p  | -1.645701114 | 1.55E-05 |
| hsa-mir-138-2-5p | -1.60806718  | 0.004588 |
| hsa-mir-5683     | -1.592020257 | 0.0551   |
| hsa-mir-369-3p   | -1.581474105 | 0.003454 |
| hsa-mir-29c-3p   | -1.581463722 | 0.000767 |
| hsa-mir-676-3p   | -1.574816458 | 0.002155 |
| hsa-mir-3139     | -1.566535951 | 0.077656 |
| hsa-mir-107      | -1.559040463 | 0.000258 |
| hsa-mir-4786-5p  | -1.542184827 | 0.00915  |
| hsa-mir-1269a    | -1.527643812 | 0.056416 |
| hsa-mir-585-3p   | -1.525438804 | 0.067922 |
| hsa-mir-6882-5p  | -1.518746997 | 0.006954 |
| hsa-mir-3200-5p  | -1.511047255 | 0.000258 |
| hsa-mir-6721-5p  | -1.49689083  | 0.017906 |
| hsa-mir-6816-3p  | -1.479939869 | 0.090402 |
| hsa-mir-326      | -1.430406394 | 0.002356 |

|                   |              |          |
|-------------------|--------------|----------|
| hsa-mir-134-5p    | -1.421278206 | 0.019292 |
| hsa-mir-98-5p     | -1.400678868 | 3.13E-06 |
| hsa-mir-4738-3p   | -1.389175532 | 0.034906 |
| hsa-mir-374a-5p   | -1.382680934 | 0.000961 |
| hsa-mir-6516-3p   | -1.377674918 | 0.008965 |
| hsa-mir-2681-3p   | -1.377630972 | 0.059019 |
| hsa-mir-95-3p     | -1.366505589 | 0.000902 |
| hsa-mir-409-3p    | -1.340539473 | 0.044186 |
| hsa-mir-191-3p    | -1.303109552 | 5.6E-05  |
| hsa-mir-4767      | -1.301720541 | 0.013482 |
| hsa-mir-29a-5p    | -1.291343236 | 0.001383 |
| hsa-mir-30e-3p    | -1.271006371 | 9.03E-06 |
| hsa-mir-204-5p    | -1.265013518 | 0.056829 |
| hsa-mir-191-5p    | -1.259840601 | 0.001238 |
| hsa-mir-340-3p    | -1.258716736 | 0.001383 |
| hsa-mir-488-3p    | -1.237419566 | 0.02955  |
| hsa-mir-3117-3p   | -1.218307837 | 0.005913 |
| hsa-mir-4787-3p   | -1.207100624 | 1.56E-05 |
| hsa-mir-3064-3p   | -1.187295875 | 0.056416 |
| hsa-mir-340-5p    | -1.174749646 | 0.01814  |
| hsa-mir-181a-1-3p | -1.169565944 | 0.027    |
| hsa-mir-361-5p    | -1.166473567 | 0.000133 |
| hsa-mir-369-5p    | -1.158911456 | 0.05748  |
| hsa-mir-659-5p    | -1.13213103  | 0.03234  |
| hsa-mir-1307-5p   | -1.127079307 | 0.006361 |
| hsa-mir-30b-3p    | -1.090164017 | 0.075778 |
| hsa-mir-337-5p    | -1.08571573  | 0.02589  |
| hsa-mir-30e-5p    | -1.077129538 | 0.003134 |
| hsa-mir-324-5p    | -1.070201475 | 0.000344 |
| hsa-mir-101-1-5p  | -1.06776533  | 0.011192 |
| hsa-mir-376a-1-5p | -1.067606174 | 0.093089 |
| hsa-mir-101-2     | -1.055011141 | 0.07808  |
| hsa-mir-30b-5p    | -1.050026261 | 0.004179 |
| hsa-mir-1306-5p   | -1.027276897 | 0.003547 |
| hsa-mir-190a-3p   | -1.02246198  | 0.036136 |
| hsa-mir-1180-3p   | -1.001321632 | 0.037912 |
| hsa-mir-2110      | -0.993507271 | 0.017946 |
| hsa-mir-628-3p    | -0.991482387 | 0.000739 |
| hsa-mir-26a-2-5p  | -0.96328031  | 0.049949 |
| hsa-mir-181d      | -0.961788964 | 0.052313 |
| hsa-mir-181c-5p   | -0.923042485 | 0.037912 |

|                 |              |          |
|-----------------|--------------|----------|
| hsa-mir-328-3p  | -0.913621809 | 0.000757 |
| hsa-mir-331-5p  | -0.899587113 | 0.005327 |
| hsa-let-7g-3p   | -0.894303816 | 0.017906 |
| hsa-mir-1301-3p | -0.887754992 | 0.016155 |
| hsa-mir-146b-5p | -0.882802256 | 0.07608  |
| hsa-let-7d-3p   | -0.819888083 | 0.008053 |
| hsa-mir-425-3p  | -0.748013309 | 0.01814  |
| hsa-let-7d-5p   | -0.669784979 | 0.063803 |
| hsa-mir-29a-3p  | -0.664546817 | 0.004525 |
| hsa-mir-30a-3p  | -0.656755167 | 0.063878 |
| hsa-mir-1307-3p | -0.614239589 | 0.004773 |

### **263 miRNAs upregulated in GBM**

| miRNA name        | log2FoldChange | padj        |
|-------------------|----------------|-------------|
| hsa-mir-615-3p    | 8.754048903    | 7.33481E-13 |
| hsa-mir-199a-1-3p | 7.278434937    | 1.33786E-12 |
| hsa-mir-10a-3p    | 7.146310697    | 1.44779E-10 |
| hsa-mir-10b-3p    | 6.457874774    | 8.69112E-15 |
| hsa-mir-892b      | 5.685030773    | 5.33793E-07 |
| hsa-mir-888-5p    | 5.64151116     | 1.71611E-13 |
| hsa-mir-1908-5p   | 5.277463042    | 2.79467E-07 |
| hsa-mir-891a-5p   | 5.264511879    | 6.6424E-13  |
| hsa-mir-199b-5p   | 5.096158265    | 4.67831E-12 |
| hsa-mir-6503-5p   | 5.091795275    | 2.31595E-10 |
| hsa-mir-6503-3p   | 5.072145474    | 1.0897E-13  |
| hsa-mir-21-5p     | 4.924199432    | 1.35761E-58 |
| hsa-mir-3679-5p   | 4.898773849    | 4.32805E-06 |
| hsa-mir-196b-3p   | 4.839208998    | 0.00013029  |
| hsa-mir-4466      | 4.674129004    | 0.000241292 |
| hsa-mir-891b      | 4.668171373    | 7.48083E-07 |
| hsa-mir-96-5p     | 4.479282212    | 2.09907E-10 |
| hsa-mir-503-3p    | 4.428458358    | 0.000117111 |
| hsa-mir-196a-2-5p | 4.400791494    | 0.004995367 |
| hsa-mir-3591-5p   | 4.362894094    | 0.005196511 |
| hsa-mir-892c-3p   | 4.349275301    | 0.001136576 |
| hsa-mir-190b      | 4.275031103    | 3.7396E-08  |
| hsa-mir-182-3p    | 4.208326332    | 0.008303119 |
| hsa-mir-4474-3p   | 4.188739768    | 0.002078837 |
| hsa-mir-3619-5p   | 4.17986215     | 0.001014962 |
| hsa-mir-892a      | 4.160232618    | 1.20529E-07 |

|                   |             |             |
|-------------------|-------------|-------------|
| hsa-mir-21-3p     | 4.14795477  | 5.08741E-39 |
| hsa-mir-4423-3p   | 4.145887092 | 0.000146342 |
| hsa-mir-196a-2-3p | 4.140094459 | 0.055100072 |
| hsa-mir-27a-5p    | 4.134179792 | 5.67205E-15 |
| hsa-mir-10b-5p    | 4.115891647 | 1.11634E-06 |
| hsa-mir-4772-5p   | 3.996637499 | 0.000399774 |
| hsa-mir-4772-3p   | 3.971861044 | 0.001689109 |
| hsa-mir-6125      | 3.968236377 | 0.001401232 |
| hsa-mir-3659      | 3.896989811 | 0.000516322 |
| hsa-mir-3143      | 3.829523148 | 3.1582E-06  |
| hsa-mir-10a-5p    | 3.798454248 | 1.98924E-07 |
| hsa-mir-615-5p    | 3.778495813 | 0.018690691 |
| hsa-mir-193a-3p   | 3.742732904 | 4.45084E-08 |
| hsa-mir-5001-5p   | 3.608307947 | 0.006485676 |
| hsa-mir-4741      | 3.561303275 | 0.000654687 |
| hsa-mir-888-3p    | 3.532203383 | 0.029904065 |
| hsa-mir-144-5p    | 3.496240277 | 9.04795E-12 |
| hsa-mir-3651      | 3.479960604 | 0.009337371 |
| hsa-mir-450b-5p   | 3.461692974 | 1.18644E-12 |
| hsa-mir-4649-5p   | 3.343550446 | 0.018718978 |
| hsa-mir-450a-1-5p | 3.33632797  | 0.057479868 |
| hsa-mir-142-3p    | 3.326423838 | 1.52106E-11 |
| hsa-mir-155-5p    | 3.273055179 | 1.75099E-26 |
| hsa-mir-210-3p    | 3.271111592 | 1.86503E-17 |
| hsa-mir-449c-5p   | 3.26979318  | 3.11237E-05 |
| hsa-mir-2114-3p   | 3.255872283 | 2.76105E-05 |
| hsa-mir-599       | 3.236100507 | 0.030483378 |
| hsa-mir-199a-2-3p | 3.222106311 | 0.006935055 |
| hsa-mir-296-3p    | 3.185849773 | 3.88209E-08 |
| hsa-mir-3911      | 3.179402597 | 0.040600554 |
| hsa-mir-424-3p    | 3.177628566 | 5.3982E-12  |
| hsa-mir-224-5p    | 3.171293254 | 4.14828E-12 |
| hsa-mir-142-5p    | 3.146775682 | 3.08782E-15 |
| hsa-mir-449b-5p   | 3.141731108 | 0.001270347 |
| hsa-mir-4711-5p   | 3.09243447  | 0.076581855 |
| hsa-mir-6727-5p   | 3.090626717 | 0.049358159 |
| hsa-mir-214-5p    | 3.068353757 | 2.47919E-05 |
| hsa-mir-92b-5p    | 3.054241367 | 7.14583E-15 |
| hsa-mir-675-5p    | 3.02831834  | 0.012389814 |
| hsa-mir-24-2-5p   | 3.021157136 | 2.98367E-24 |
| hsa-mir-3937      | 3.008890464 | 0.039423898 |

|                   |             |             |
|-------------------|-------------|-------------|
| hsa-mir-4777-3p   | 2.966605551 | 0.024576343 |
| hsa-mir-4521      | 2.965270252 | 0.000520051 |
| hsa-mir-2114-5p   | 2.95281094  | 0.000199197 |
| hsa-mir-3913-1-5p | 2.861445289 | 0.031400809 |
| hsa-mir-4516      | 2.844834588 | 0.039599925 |
| hsa-mir-4649-3p   | 2.839448256 | 0.00171963  |
| hsa-mir-223-5p    | 2.828245161 | 2.85138E-07 |
| hsa-mir-493-3p    | 2.814567186 | 6.93097E-06 |
| hsa-mir-451a      | 2.757845052 | 2.55068E-07 |
| hsa-mir-7976      | 2.747953    | 0.00183087  |
| hsa-mir-219a-1-5p | 2.709824515 | 2.51765E-05 |
| hsa-mir-4648      | 2.709096553 | 0.012021171 |
| hsa-mir-503-5p    | 2.708598594 | 1.96795E-08 |
| hsa-mir-365b-5p   | 2.704165682 | 1.53918E-06 |
| hsa-mir-144-3p    | 2.700448641 | 1.0377E-09  |
| hsa-mir-135a-1-3p | 2.688539952 | 0.000581361 |
| hsa-mir-3129-3p   | 2.684505484 | 1.50868E-06 |
| hsa-mir-3194-5p   | 2.670137503 | 1.11448E-05 |
| hsa-mir-92b-3p    | 2.632405299 | 3.29693E-08 |
| hsa-mir-3609      | 2.586632504 | 0.001977073 |
| hsa-mir-493-5p    | 2.574552644 | 0.000205031 |
| hsa-mir-4433b-5p  | 2.539754656 | 0.002210715 |
| hsa-mir-23a-3p    | 2.5388906   | 7.62861E-17 |
| hsa-mir-7705      | 2.532390789 | 6.03021E-07 |
| hsa-mir-23a-5p    | 2.52011803  | 0.008997858 |
| hsa-mir-605-3p    | 2.518348339 | 0.002210715 |
| hsa-mir-3614-5p   | 2.515499107 | 0.001933278 |
| hsa-mir-4732-5p   | 2.458219615 | 0.007288501 |
| hsa-mir-217       | 2.456142127 | 0.008053021 |
| hsa-mir-135b-3p   | 2.455922234 | 0.000510669 |
| hsa-mir-210-5p    | 2.449390945 | 8.39814E-12 |
| hsa-mir-150-5p    | 2.429252291 | 0.00012549  |
| hsa-mir-195-3p    | 2.422804858 | 7.47803E-11 |
| hsa-mir-15b-3p    | 2.403395714 | 3.46928E-07 |
| hsa-mir-4746-5p   | 2.400142524 | 8.48557E-07 |
| hsa-mir-500b-3p   | 2.390775457 | 0.009232485 |
| hsa-mir-4709*     | 2.368912469 | 0.07081071  |
| hsa-mir-6852-5p   | 2.362003617 | 6.13655E-07 |
| hsa-mir-216a-3p   | 2.337857402 | 0.048264568 |
| hsa-mir-4802-5p   | 2.323250257 | 0.096302512 |
| hsa-mir-4725-5p   | 2.28173713  | 0.061848407 |

|                  |             |             |
|------------------|-------------|-------------|
| hsa-mir-2115-3p  | 2.276995301 | 0.008303119 |
| hsa-mir-455-3p   | 2.275312376 | 1.03249E-11 |
| hsa-mir-92a-1-5p | 2.261980851 | 0.00156495  |
| hsa-mir-16-2-5p  | 2.254277983 | 0.017747245 |
| hsa-mir-1262     | 2.250316908 | 9.54445E-06 |
| hsa-mir-4687-3p  | 2.247857614 | 0.033345187 |
| hsa-mir-942-5p   | 2.246838455 | 1.88035E-06 |
| hsa-mir-150-3p   | 2.244999495 | 0.000480151 |
| hsa-mir-4690-3p  | 2.244712179 | 0.035185119 |
| hsa-mir-3194-3p  | 2.241776888 | 0.016215761 |
| hsa-mir-548e-3p  | 2.241753454 | 2.70668E-06 |
| hsa-mir-222-5p   | 2.237491594 | 3.36722E-05 |
| hsa-mir-6502-5p  | 2.221548508 | 0.003354854 |
| hsa-mir-34c-5p   | 2.195247487 | 0.018993208 |
| hsa-mir-214-3p   | 2.157939156 | 0.003926674 |
| hsa-mir-6875-5p  | 2.15267133  | 0.029407208 |
| hsa-mir-152-5p   | 2.129099947 | 0.025889587 |
| hsa-mir-3942-5p  | 2.108877204 | 0.001392274 |
| hsa-mir-16-1-5p  | 2.106970919 | 0.013282638 |
| hsa-mir-371b-5p  | 2.104178462 | 0.009194738 |
| hsa-mir-25-5p    | 2.102524939 | 2.76105E-05 |
| hsa-mir-3616-5p  | 2.095785512 | 0.09956403  |
| hsa-mir-188-5p   | 2.087037643 | 4.45084E-08 |
| hsa-mir-4423-5p  | 2.082804093 | 0.016155072 |
| hsa-mir-223-3p   | 2.061932626 | 4.92894E-06 |
| hsa-mir-629-3p   | 2.029797519 | 0.000391246 |
| hsa-mir-4642     | 2.010932108 | 0.099476534 |
| hsa-mir-3653-5p  | 2.007859671 | 0.02306824  |
| hsa-mir-143-5p   | 2.001456102 | 1.36031E-05 |
| hsa-mir-497-5p   | 1.995953066 | 1.93049E-11 |
| hsa-mir-502-3p   | 1.989885621 | 0.000160093 |
| hsa-mir-296-5p   | 1.967881172 | 6.63637E-05 |
| hsa-mir-497-3p   | 1.958148398 | 1.28153E-06 |
| hsa-mir-1276     | 1.947653067 | 0.003323155 |
| hsa-mir-216a-5p  | 1.939586176 | 0.063599166 |
| hsa-mir-106b-3p  | 1.932946808 | 8.54236E-09 |
| hsa-mir-27a-3p   | 1.903977084 | 3.83095E-09 |
| hsa-mir-501-3p   | 1.894355052 | 0.001330594 |
| hsa-mir-1228-3p  | 1.891485449 | 5.59289E-05 |
| hsa-mir-216b-5p  | 1.885297468 | 0.056335796 |
| hsa-mir-6513-3p  | 1.847503864 | 0.012105259 |

|                  |             |             |
|------------------|-------------|-------------|
| hsa-mir-6501-5p  | 1.847010963 | 0.063599166 |
| hsa-mir-556-5p   | 1.832109357 | 0.006976922 |
| hsa-mir-937-3p   | 1.824681552 | 3.62264E-05 |
| hsa-mir-224-3p   | 1.817929762 | 0.008611713 |
| hsa-mir-542-5p   | 1.816107313 | 0.001933278 |
| hsa-mir-2115-5p  | 1.810327304 | 0.099476534 |
| hsa-mir-15b-5p   | 1.78121826  | 3.11237E-05 |
| hsa-mir-455-5p   | 1.780233046 | 4.33421E-09 |
| hsa-mir-1228-5p  | 1.773954561 | 0.005055697 |
| hsa-mir-3150b-3p | 1.753801238 | 0.094679612 |
| hsa-mir-4326     | 1.736010798 | 0.001213291 |
| hsa-mir-339-5p   | 1.732079938 | 0.007835861 |
| hsa-mir-4647     | 1.723893806 | 0.079785879 |
| hsa-mir-4803     | 1.715773616 | 0.029165869 |
| hsa-mir-3176     | 1.707509791 | 5.89564E-10 |
| hsa-mir-20b-3p   | 1.686861987 | 0.091149203 |
| hsa-mir-186-3p   | 1.675713248 | 0.021746815 |
| hsa-mir-576-5p   | 1.674666718 | 0.037357891 |
| hsa-mir-627-5p   | 1.667872178 | 8.88101E-06 |
| hsa-mir-219b-5p  | 1.656320007 | 0.086192464 |
| hsa-mir-3661     | 1.646589478 | 0.000084878 |
| hsa-mir-548ba    | 1.634435297 | 0.006485676 |
| hsa-mir-423-3p   | 1.625382387 | 1.33776E-08 |
| hsa-mir-4709-5p  | 1.619964325 | 0.046429831 |
| hsa-mir-486-2-5p | 1.609439646 | 0.020890656 |
| hsa-mir-3622a-3p | 1.59353813  | 0.019757722 |
| hsa-mir-93-3p    | 1.584648402 | 0.000211055 |
| hsa-mir-4661-5p  | 1.576343026 | 0.021601294 |
| hsa-mir-4758-3p  | 1.552988829 | 0.051653419 |
| hsa-mir-551b-3p  | 1.551497473 | 2.12406E-05 |
| hsa-mir-3129-5p  | 1.551433164 | 0.055878258 |
| hsa-mir-3187-3p  | 1.549770976 | 0.005239952 |
| hsa-mir-93-5p    | 1.543707132 | 0.0000526   |
| hsa-mir-193a-5p  | 1.543182556 | 0.004772616 |
| hsa-mir-320a     | 1.540282257 | 3.22131E-09 |
| hsa-mir-589-3p   | 1.52122931  | 2.75035E-05 |
| hsa-mir-424-5p   | 1.521117166 | 0.001070467 |
| hsa-mir-532-3p   | 1.515499298 | 1.47502E-06 |
| hsa-mir-34a-3p   | 1.512032164 | 0.012734017 |
| hsa-mir-3065-3p  | 1.501433396 | 0.017946399 |
| hsa-mir-542-3p   | 1.500372426 | 0.005938413 |



|                 |             |             |
|-----------------|-------------|-------------|
| hsa-mir-34c-3p  | 1.486174164 | 0.074491592 |
| hsa-mir-3136-5p | 1.471743995 | 0.085133398 |
| hsa-mir-148a-3p | 1.470462766 | 0.016369034 |
| hsa-mir-1226-5p | 1.446347582 | 0.046429831 |
| hsa-mir-618     | 1.444598433 | 0.006874383 |
| hsa-mir-19a-3p  | 1.434596251 | 0.021214217 |
| hsa-mir-551b-5p | 1.432443378 | 0.061355946 |
| hsa-mir-25-3p   | 1.430502531 | 0.0000526   |
| hsa-mir-3940-3p | 1.429672353 | 0.011655485 |
| hsa-mir-3151-5p | 1.427140061 | 0.056416404 |
| hsa-mir-152-3p  | 1.422680986 | 0.003218852 |
| hsa-mir-431-5p  | 1.408593213 | 0.089196046 |
| hsa-mir-27b-5p  | 1.406147046 | 0.008997858 |
| hsa-mir-4636    | 1.363820714 | 0.060564085 |
| hsa-mir-449a    | 1.318326117 | 0.053007051 |
| hsa-mir-548al   | 1.31047952  | 0.002675554 |
| hsa-mir-548k    | 1.290700927 | 0.000157173 |
| hsa-mir-200b-3p | 1.285793008 | 0.00717205  |
| hsa-mir-215-5p  | 1.279410708 | 0.085408907 |
| hsa-mir-28-3p   | 1.278641522 | 4.36725E-05 |
| hsa-mir-452-3p  | 1.270316379 | 0.019707535 |
| hsa-mir-3691-5p | 1.265364844 | 0.018836615 |
| hsa-mir-4775-5p | 1.258660424 | 8.71995E-05 |
| hsa-mir-556-3p  | 1.252747617 | 0.093602432 |
| hsa-mir-423-5p  | 1.243219683 | 5.91883E-05 |
| hsa-mir-653-3p  | 1.240114763 | 0.071154201 |
| hsa-mir-624-3p  | 1.238998527 | 0.099122726 |
| hsa-mir-130a-5p | 1.234627742 | 0.069641811 |
| hsa-mir-452-5p  | 1.233628073 | 0.033230581 |
| hsa-mir-28-5p   | 1.233340763 | 0.000169527 |
| hsa-mir-362-3p  | 1.227750847 | 0.002155649 |
| hsa-mir-26b-3p  | 1.227432453 | 0.004995367 |
| hsa-mir-3922-3p | 1.217309978 | 0.023943344 |
| hsa-mir-939-5p  | 1.216907108 | 0.073666091 |
| hsa-mir-532-5p  | 1.212322554 | 4.35778E-05 |
| hsa-let-7c-3p   | 1.210491583 | 1.54707E-05 |
| hsa-mir-502-5p  | 1.181445839 | 0.002790689 |
| hsa-mir-208b-3p | 1.17014128  | 0.013603999 |
| hsa-mir-148a-5p | 1.164473655 | 0.03761744  |
| hsa-mir-130b-3p | 1.140796655 | 0.001384145 |
| hsa-mir-1266-5p | 1.133151461 | 0.033390675 |

|                  |             |             |
|------------------|-------------|-------------|
| hsa-mir-335-5p   | 1.12282491  | 0.064411152 |
| hsa-mir-3174     | 1.118614061 | 0.047868847 |
| hsa-mir-130a-3p  | 1.117167069 | 0.000917078 |
| hsa-mir-106b-5p  | 1.086925628 | 0.003922355 |
| hsa-mir-454-5p   | 1.078507243 | 0.015760122 |
| hsa-mir-301a-5p  | 1.078385494 | 0.003174819 |
| hsa-mir-454-3p   | 1.061396726 | 0.001845931 |
| hsa-mir-193b-3p  | 1.01014283  | 0.00467807  |
| hsa-mir-2277-5p  | 0.983096271 | 9.85371E-05 |
| hsa-mir-505-3p   | 0.975746312 | 0.014272899 |
| hsa-mir-548ah-5p | 0.969394154 | 0.079785879 |
| hsa-mir-17-3p    | 0.955899372 | 0.04626329  |
| hsa-mir-4645-3p  | 0.939969512 | 0.011236671 |
| hsa-mir-193b-5p  | 0.938294779 | 0.034350891 |
| hsa-mir-671-5p   | 0.925149786 | 0.094189085 |
| hsa-mir-500a-3p  | 0.8874222   | 0.000931657 |
| hsa-mir-548b-3p  | 0.87527052  | 0.056416404 |
| hsa-mir-18a-3p   | 0.871166969 | 0.086204615 |
| hsa-mir-148b-5p  | 0.869651834 | 0.000080927 |
| hsa-mir-5001-3p  | 0.861165509 | 0.056416404 |
| hsa-let-7i-5p    | 0.853143385 | 0.007931787 |
| hsa-mir-580-3p   | 0.839344317 | 0.035575895 |
| hsa-mir-195-5p   | 0.821324386 | 0.009073724 |
| hsa-mir-345-5p   | 0.773474931 | 0.012021171 |
| hsa-mir-3613-5p  | 0.745181282 | 0.039036124 |
| hsa-mir-652-5p   | 0.739209013 | 0.055100072 |
| hsa-mir-141-3p   | 0.736617728 | 0.073443627 |
| hsa-mir-501-5p   | 0.700181879 | 0.023355635 |
| hsa-mir-125a-3p  | 0.663627429 | 0.058260766 |
| hsa-mir-22-3p    | 0.63677942  | 0.035621221 |
| hsa-mir-660-5p   | 0.608362845 | 0.06380315  |
| hsa-mir-99a-3p   | 0.603292795 | 0.008390121 |

**Supplemental Table S6B: DESeq2 analysis of differential miRNA expression in 5 GBM compared to 6 CC samples**

**268 miRNAs downregulated in GBM**

| miRNA             | log2FoldChange | padj     |
|-------------------|----------------|----------|
| hsa-mir-577       | -9.61670562    | 1.03E-45 |
| hsa-mir-219a-2-5p | -8.777002667   | 1.53E-32 |
| hsa-mir-3663-3p   | -7.724301873   | 8.2E-07  |
| hsa-mir-876-5p    | -7.272390415   | 3.08E-13 |

|                   |              |          |
|-------------------|--------------|----------|
| hsa-mir-7158-5p   | -7.049953415 | 1.79E-05 |
| hsa-mir-6828-5p   | -7.025756938 | 1.12E-05 |
| hsa-mir-338-3p    | -6.963040557 | 1.54E-56 |
| hsa-mir-490-5p    | -6.625747233 | 5.05E-05 |
| hsa-mir-873-5p    | -6.332942951 | 1.13E-46 |
| hsa-mir-873-3p    | -6.20798061  | 2.03E-19 |
| hsa-mir-1250-5p   | -5.919995165 | 1.56E-27 |
| hsa-mir-338-5p    | -5.820935941 | 3.19E-18 |
| hsa-mir-5196-3p   | -5.778692526 | 0.000676 |
| hsa-mir-1911-5p   | -5.535279644 | 6.99E-06 |
| hsa-mir-383-3p    | -5.517894051 | 0.002361 |
| hsa-mir-6881-3p   | -5.50729916  | 1.82E-05 |
| hsa-mir-876-3p    | -5.497097178 | 2.13E-05 |
| hsa-mir-1298-5p   | -5.476330799 | 1.7E-08  |
| hsa-mir-4729      | -5.380335112 | 4.31E-05 |
| hsa-mir-490-3p    | -5.379841066 | 1.03E-15 |
| hsa-mir-539-5p    | -5.363605372 | 2.89E-40 |
| hsa-mir-6841-5p   | -5.276088158 | 0.003184 |
| hsa-mir-3663-5p   | -5.212751019 | 0.003218 |
| hsa-mir-513c-5p   | -5.184152194 | 1.86E-06 |
| hsa-mir-642a-3p   | -5.09888222  | 7.04E-07 |
| hsa-mir-1264      | -5.082670339 | 1.25E-07 |
| hsa-mir-184       | -5.024295966 | 3.61E-14 |
| hsa-mir-1298-3p   | -4.910220367 | 6.94E-08 |
| hsa-mir-657       | -4.88936164  | 0.006173 |
| hsa-mir-3173-3p   | -4.881097625 | 0.008279 |
| hsa-mir-3943      | -4.852442801 | 2.52E-19 |
| hsa-mir-584-5p    | -4.796011039 | 2.84E-37 |
| hsa-mir-1249-5p   | -4.671137232 | 1.06E-26 |
| hsa-mir-6872-5p   | -4.590377901 | 0.019394 |
| hsa-mir-1912      | -4.590127095 | 4.37E-05 |
| hsa-mir-6827-5p   | -4.578694358 | 0.01265  |
| hsa-mir-139-3p    | -4.485234749 | 4.95E-31 |
| hsa-mir-6507-5p   | -4.441945937 | 8.44E-07 |
| hsa-mir-181a-1-5p | -4.431096109 | 0.017091 |
| hsa-mir-412-5p    | -4.408575499 | 0.041612 |
| hsa-mir-1224-5p   | -4.271253316 | 2.1E-21  |
| hsa-mir-211-5p    | -4.268718472 | 0.000676 |
| hsa-mir-6872-3p   | -4.255413207 | 0.005573 |
| hsa-mir-522-3p    | -4.244170635 | 0.002691 |
| hsa-mir-3612      | -4.227673191 | 0.03405  |

|                   |              |          |
|-------------------|--------------|----------|
| hsa-mir-642a-5p   | -4.160199936 | 3.63E-13 |
| hsa-mir-433-3p    | -4.128069789 | 3.26E-14 |
| hsa-mir-139-5p    | -4.118897024 | 1.87E-34 |
| hsa-mir-330-5p    | -4.077495221 | 1.03E-57 |
| hsa-mir-6876-5p   | -4.070226653 | 0.036058 |
| hsa-mir-4501      | -3.998571356 | 0.050103 |
| hsa-mir-3167      | -3.979225167 | 0.000854 |
| hsa-mir-1277-3p   | -3.977243845 | 1.94E-05 |
| hsa-mir-203b-3p   | -3.947752383 | 5.22E-06 |
| hsa-mir-330-3p    | -3.874472796 | 5.09E-33 |
| hsa-mir-584-3p    | -3.83563945  | 2.11E-06 |
| hsa-mir-5008-3p   | -3.799795634 | 0.010928 |
| hsa-mir-4780      | -3.767562182 | 8.56E-08 |
| hsa-mir-302c-3p   | -3.762719452 | 0.062893 |
| hsa-mir-4525      | -3.750513162 | 0.002472 |
| hsa-mir-3120-5p   | -3.656693998 | 0.078051 |
| hsa-mir-5191      | -3.610237423 | 0.00039  |
| hsa-mir-520a-3p   | -3.562556132 | 0.07693  |
| hsa-mir-181a-2-5p | -3.554387844 | 0.000275 |
| hsa-mir-3139      | -3.542805141 | 9.87E-12 |
| hsa-mir-3200-3p   | -3.483306634 | 1.6E-25  |
| hsa-mir-3120-3p   | -3.472196322 | 0.004703 |
| hsa-mir-5699-5p   | -3.441510591 | 3.37E-25 |
| hsa-mir-1250-3p   | -3.422347289 | 0.017622 |
| hsa-mir-4640-5p   | -3.406743563 | 0.006774 |
| hsa-mir-203a-5p   | -3.373768643 | 7.96E-06 |
| hsa-mir-6794-3p   | -3.357270536 | 0.008827 |
| hsa-mir-874-3p    | -3.335611129 | 1.27E-13 |
| hsa-mir-1286      | -3.321039123 | 8.64E-08 |
| hsa-mir-4446-5p   | -3.320861564 | 0.031642 |
| hsa-mir-1231      | -3.26942406  | 0.000645 |
| hsa-mir-137       | -3.253805991 | 1.18E-07 |
| hsa-mir-4641      | -3.25097157  | 0.001659 |
| hsa-mir-346       | -3.246582515 | 2.09E-12 |
| hsa-mir-3938      | -3.200758506 | 1.92E-05 |
| hsa-mir-3919      | -3.155012378 | 0.036603 |
| hsa-mir-6734-5p   | -3.111357101 | 3.34E-05 |
| hsa-mir-4515      | -3.087338154 | 0.000988 |
| hsa-mir-4798-5p   | -3.003297933 | 4.73E-05 |
| hsa-mir-1296-5p   | -2.998271356 | 3.55E-19 |
| hsa-mir-499a-5p   | -2.951335913 | 1.82E-22 |

|                   |              |          |
|-------------------|--------------|----------|
| hsa-mir-6877-3p   | -2.918043324 | 0.009025 |
| hsa-mir-4683      | -2.897992887 | 0.088313 |
| hsa-mir-889-3p    | -2.887188603 | 6.96E-06 |
| hsa-mir-548v      | -2.884522164 | 0.00199  |
| hsa-mir-6837-5p   | -2.870282484 | 0.092431 |
| hsa-mir-33a-5p    | -2.85132041  | 1.56E-08 |
| hsa-mir-33b-5p    | -2.803411473 | 4.69E-05 |
| hsa-mir-2276-5p   | -2.803207542 | 0.006057 |
| hsa-mir-3617-5p   | -2.7736988   | 0.000129 |
| hsa-mir-4640-3p   | -2.732967145 | 4.14E-15 |
| hsa-mir-4671-3p   | -2.692064976 | 0.010309 |
| hsa-mir-770-5p    | -2.691991474 | 7.22E-05 |
| hsa-mir-375       | -2.661623896 | 0.003828 |
| hsa-mir-5680      | -2.627558688 | 4.3E-05  |
| hsa-mir-29c-5p    | -2.619462566 | 3.13E-05 |
| hsa-mir-5187-5p   | -2.593095627 | 0.013765 |
| hsa-mir-767-3p    | -2.588172216 | 0.086596 |
| hsa-mir-767-5p    | -2.561542889 | 5.46E-06 |
| hsa-mir-1296-3p   | -2.559424419 | 2.07E-06 |
| hsa-mir-5699-3p   | -2.553008641 | 0.000243 |
| hsa-mir-499a-3p   | -2.5337667   | 2.13E-05 |
| hsa-mir-6865-3p   | -2.530407423 | 0.003997 |
| hsa-mir-154-3p    | -2.52438009  | 3.5E-06  |
| hsa-mir-4731-3p   | -2.486035274 | 6.25E-05 |
| hsa-mir-323b-3p   | -2.469540812 | 0.000296 |
| hsa-mir-23c-5p    | -2.412188467 | 0.007408 |
| hsa-mir-410-3p    | -2.407545188 | 0.000337 |
| hsa-mir-433-5p    | -2.404262061 | 3.51E-05 |
| hsa-mir-6786-3p   | -2.384723392 | 0.000361 |
| hsa-mir-3188      | -2.356863582 | 0.006902 |
| hsa-mir-3173-5p   | -2.350174546 | 2.46E-05 |
| hsa-mir-504-5p    | -2.3490941   | 0.001939 |
| hsa-mir-1252-5p   | -2.321716355 | 0.004722 |
| hsa-mir-6777-5p   | -2.311100134 | 0.03001  |
| hsa-mir-541-3p    | -2.310545393 | 0.018361 |
| hsa-mir-431-3p    | -2.292609482 | 0.005421 |
| hsa-mir-3617-3p   | -2.292414732 | 0.043363 |
| hsa-mir-4696      | -2.276322168 | 0.042731 |
| hsa-mir-383-5p    | -2.268251448 | 0.021438 |
| hsa-mir-181a-1-3p | -2.249843876 | 1.35E-07 |
| hsa-mir-574-3p    | -2.231871798 | 3.71E-08 |

|                  |              |          |
|------------------|--------------|----------|
| hsa-mir-1287-3p  | -2.230659437 | 0.015016 |
| hsa-mir-4738-3p  | -2.222032323 | 2.65E-05 |
| hsa-mir-4639-3p  | -2.205172397 | 0.088313 |
| hsa-mir-128-1-5p | -2.184849244 | 2.4E-09  |
| hsa-mir-4522     | -2.161929403 | 0.086738 |
| hsa-mir-668-3p   | -2.161050845 | 0.001487 |
| hsa-mir-33a-3p   | -2.158204841 | 1.82E-05 |
| hsa-mir-598-5p   | -2.121227226 | 0.002472 |
| hsa-mir-340-5p   | -2.111971226 | 4.6E-15  |
| hsa-mir-744-3p   | -2.102262015 | 1.33E-17 |
| hsa-mir-487b-5p  | -2.095337846 | 0.000337 |
| hsa-mir-496      | -2.092772572 | 0.000729 |
| hsa-mir-190a-3p  | -2.078502972 | 2.45E-07 |
| hsa-mir-3622b-5p | -2.052894994 | 0.07474  |
| hsa-mir-1287-5p  | -2.035257608 | 2.04E-07 |
| hsa-mir-342-3p   | -2.006392974 | 2.56E-07 |
| hsa-mir-2467-5p  | -1.970681033 | 2.95E-11 |
| hsa-mir-5006-3p  | -1.953153803 | 0.007238 |
| hsa-mir-3117-3p  | -1.951920261 | 7.86E-05 |
| hsa-mir-6816-3p  | -1.942709147 | 0.017795 |
| hsa-mir-769-5p   | -1.939223644 | 1.07E-09 |
| hsa-mir-3200-5p  | -1.938810033 | 1.14E-05 |
| hsa-mir-1197     | -1.937891982 | 0.005439 |
| hsa-mir-889-5p   | -1.934658854 | 0.013785 |
| hsa-mir-5706     | -1.923073585 | 0.00022  |
| hsa-mir-6864-5p  | -1.920186095 | 0.036325 |
| hsa-mir-323a-3p  | -1.918737409 | 0.008186 |
| hsa-mir-4639-5p  | -1.914133229 | 0.013894 |
| hsa-mir-4524a-3p | -1.912735979 | 0.034391 |
| hsa-mir-370-5p   | -1.90491632  | 0.005587 |
| hsa-mir-676-3p   | -1.879756194 | 5.73E-05 |
| hsa-mir-374a-5p  | -1.876208259 | 2.78E-08 |
| hsa-mir-23b-3p   | -1.875196703 | 0.002026 |
| hsa-mir-487a-3p  | -1.870353599 | 0.005565 |
| hsa-mir-6716-3p  | -1.838309883 | 8.96E-06 |
| hsa-mir-495-3p   | -1.826598721 | 0.001327 |
| hsa-mir-432-3p   | -1.817771016 | 0.004092 |
| hsa-mir-4786-5p  | -1.816579544 | 0.00345  |
| hsa-mir-4446-3p  | -1.814624891 | 0.001304 |
| hsa-mir-24-1-5p  | -1.809976247 | 0.000136 |
| hsa-mir-6854-5p  | -1.795998563 | 0.041639 |

|                  |              |          |
|------------------|--------------|----------|
| hsa-mir-6801-3p  | -1.792177474 | 0.04266  |
| hsa-mir-487b-3p  | -1.773577578 | 0.005449 |
| hsa-mir-3124-5p  | -1.762217806 | 4.28E-05 |
| hsa-mir-874-5p   | -1.741697344 | 0.003599 |
| hsa-mir-200a-5p  | -1.739392198 | 0.036325 |
| hsa-mir-127-3p   | -1.730542796 | 0.000237 |
| hsa-mir-656-3p   | -1.725533881 | 0.001404 |
| hsa-mir-340-3p   | -1.710301433 | 1.13E-05 |
| hsa-mir-425-5p   | -1.707001652 | 0.021668 |
| hsa-mir-6733-5p  | -1.684821375 | 0.008351 |
| hsa-mir-4767     | -1.669098003 | 0.000322 |
| hsa-mir-570-3p   | -1.630876897 | 0.004528 |
| hsa-mir-3622b-3p | -1.630019717 | 0.032081 |
| hsa-let-7b-3p    | -1.622922449 | 4.71E-05 |
| hsa-mir-491-3p   | -1.615357504 | 0.007136 |
| hsa-mir-769-3p   | -1.606787467 | 6.96E-06 |
| hsa-mir-128-2-5p | -1.575449237 | 0.020267 |
| hsa-mir-381-3p   | -1.564133634 | 0.025578 |
| hsa-mir-6513-5p  | -1.5524301   | 0.004703 |
| hsa-mir-508-3p   | -1.54732057  | 0.028869 |
| hsa-mir-34b-3p   | -1.536658622 | 0.05301  |
| hsa-mir-487a-5p  | -1.533604134 | 0.016524 |
| hsa-mir-539-3p   | -1.524742692 | 0.021111 |
| hsa-mir-382-3p   | -1.501630213 | 0.012798 |
| hsa-mir-1179     | -1.460102871 | 0.000735 |
| hsa-mir-374b-5p  | -1.455315394 | 7.8E-05  |
| hsa-mir-582-5p   | -1.450128597 | 0.0015   |
| hsa-mir-3157-3p  | -1.437588285 | 0.008414 |
| hsa-mir-4787-3p  | -1.415243601 | 1.02E-06 |
| hsa-mir-6516-5p  | -1.410725012 | 0.036503 |
| hsa-mir-30a-5p   | -1.397896473 | 0.000842 |
| hsa-mir-19b-1-5p | -1.393045504 | 0.044401 |
| hsa-mir-190a-5p  | -1.389059801 | 0.000338 |
| hsa-mir-1243     | -1.386412968 | 0.009165 |
| hsa-mir-5000-3p  | -1.367874101 | 0.006057 |
| hsa-mir-323a-5p  | -1.365155104 | 0.094132 |
| hsa-mir-1307-5p  | -1.353103997 | 0.005016 |
| hsa-mir-26a-2-5p | -1.342686601 | 0.001579 |
| hsa-mir-3064-3p  | -1.332588047 | 0.026172 |
| hsa-mir-2116-5p  | -1.330017776 | 0.014271 |
| hsa-let-7d-3p    | -1.325634161 | 1.71E-08 |

|                   |              |          |
|-------------------|--------------|----------|
| hsa-mir-582-3p    | -1.308913011 | 0.006669 |
| hsa-mir-2355-5p   | -1.304273301 | 0.005455 |
| hsa-mir-3177-3p   | -1.303889539 | 0.003188 |
| hsa-mir-3605-5p   | -1.296930828 | 2.67E-06 |
| hsa-mir-2682-5p   | -1.289446577 | 0.074934 |
| hsa-mir-548aw     | -1.289309098 | 0.03109  |
| hsa-mir-1306-5p   | -1.289099472 | 6.22E-06 |
| hsa-mir-30e-3p    | -1.282757412 | 8.23E-11 |
| hsa-mir-411-5p    | -1.281877882 | 0.03707  |
| hsa-mir-127-5p    | -1.271041985 | 0.062211 |
| hsa-mir-98-5p     | -1.254655455 | 4.31E-05 |
| hsa-mir-2355-3p   | -1.250224897 | 0.001181 |
| hsa-mir-491-5p    | -1.249652635 | 0.025213 |
| hsa-mir-4757-3p   | -1.23285736  | 0.063755 |
| hsa-mir-132-3p    | -1.220077107 | 0.004703 |
| hsa-mir-760       | -1.215528606 | 0.004148 |
| hsa-mir-29b-2-5p  | -1.20869022  | 0.003667 |
| hsa-mir-30d-5p    | -1.163269099 | 0.000121 |
| hsa-mir-598-3p    | -1.163215254 | 0.034804 |
| hsa-mir-421       | -1.157078383 | 0.000197 |
| hsa-mir-2276-3p   | -1.156498558 | 0.046465 |
| hsa-mir-103a-2-5p | -1.155804686 | 0.005806 |
| hsa-mir-136-3p    | -1.145208129 | 0.043472 |
| hsa-mir-377-5p    | -1.144030054 | 0.07354  |
| hsa-let-7g-3p     | -1.114272501 | 0.002022 |
| hsa-mir-3615      | -1.091814269 | 0.000489 |
| hsa-mir-101-1-5p  | -1.08985508  | 0.007773 |
| hsa-mir-1271-5p   | -1.067338323 | 0.093646 |
| hsa-mir-6882-5p   | -1.061708395 | 0.040394 |
| hsa-mir-30e-5p    | -1.053859568 | 0.001815 |
| hsa-mir-3157-5p   | -1.052139957 | 0.050103 |
| hsa-mir-379-3p    | -1.02487354  | 0.098471 |
| hsa-mir-548e-5p   | -1.009342823 | 0.010383 |
| hsa-mir-29c-3p    | -1.006520589 | 0.05112  |
| hsa-mir-887-3p    | -0.993547218 | 0.005071 |
| hsa-mir-374b-3p   | -0.975164486 | 0.011259 |
| hsa-mir-6847-5p   | -0.9523956   | 0.088672 |
| hsa-mir-377-3p    | -0.94743454  | 0.069548 |
| hsa-mir-1294      | -0.920995434 | 0.061254 |
| hsa-mir-5010-3p   | -0.920692378 | 0.000154 |
| hsa-mir-744-5p    | -0.917332691 | 0.001091 |



|                 |              |          |
|-----------------|--------------|----------|
| hsa-mir-18a-5p  | -0.911448427 | 0.040929 |
| hsa-mir-151a-3p | -0.901481697 | 0.001041 |
| hsa-mir-185-5p  | -0.900677333 | 0.01874  |
| hsa-mir-200a-3p | -0.894108186 | 0.0072   |
| hsa-mir-590-3p  | -0.8828646   | 0.009719 |
| hsa-mir-191-5p  | -0.877008257 | 0.032978 |
| hsa-mir-628-5p  | -0.871183517 | 0.009826 |
| hsa-mir-1343-3p | -0.838614958 | 0.06286  |
| hsa-mir-590-5p  | -0.836899236 | 0.07241  |
| hsa-mir-140-3p  | -0.832746602 | 7.66E-07 |
| hsa-mir-185-3p  | -0.808968134 | 0.005955 |
| hsa-mir-29a-5p  | -0.800814179 | 0.079153 |
| hsa-mir-361-5p  | -0.79534152  | 0.003733 |
| hsa-mir-301a-3p | -0.794135626 | 0.001585 |
| hsa-mir-628-3p  | -0.737117266 | 0.028928 |
| hsa-mir-197-3p  | -0.695531065 | 0.023074 |
| hsa-mir-328-3p  | -0.678189635 | 0.013872 |
| hsa-mir-374a-3p | -0.600607387 | 0.057143 |

### **303 miRNAs upregulated in GBM**

| miRNAs            | log2FoldChange | padj     |
|-------------------|----------------|----------|
| hsa-mir-199a-1-3p | 10.64434196    | 5.36E-13 |
| hsa-mir-615-3p    | 9.010995011    | 8.52E-12 |
| hsa-mir-891b      | 8.338166241    | 1.29E-07 |
| hsa-mir-6503-5p   | 7.787404321    | 1.19E-10 |
| hsa-mir-892b      | 7.563046072    | 3.26E-06 |
| hsa-mir-10b-3p    | 7.490793441    | 1.87E-24 |
| hsa-mir-892a      | 7.46119447     | 3.44E-12 |
| hsa-mir-891a-5p   | 7.193847133    | 1.5E-23  |
| hsa-mir-3614-5p   | 7.126210092    | 6.96E-06 |
| hsa-mir-6503-3p   | 7.037387117    | 6.7E-18  |
| hsa-mir-196a-2-3p | 6.965720644    | 0.000124 |
| hsa-mir-675-5p    | 6.938105039    | 6.05E-05 |
| hsa-mir-888-5p    | 6.679125184    | 6.95E-13 |
| hsa-mir-10a-3p    | 6.414455237    | 2.06E-10 |
| hsa-mir-199b-5p   | 6.302721448    | 5.89E-18 |
| hsa-mir-4466      | 6.278754683    | 0.000225 |
| hsa-mir-182-3p    | 6.188031394    | 0.001039 |
| hsa-mir-196a-2-5p | 6.062396213    | 0.000847 |
| hsa-mir-4772-3p   | 6.024460792    | 0.000525 |

|                   |             |          |
|-------------------|-------------|----------|
| hsa-mir-3591-5p   | 5.964815058 | 0.001162 |
| hsa-mir-599       | 5.960017647 | 0.001441 |
| hsa-mir-96-5p     | 5.941830619 | 8.56E-17 |
| hsa-mir-4474-3p   | 5.86214989  | 0.000815 |
| hsa-mir-3619-5p   | 5.784464207 | 0.000865 |
| hsa-mir-892c-3p   | 5.777927088 | 0.000112 |
| hsa-mir-1908-5p   | 5.727832272 | 5.65E-08 |
| hsa-mir-4516      | 5.678844182 | 7.82E-06 |
| hsa-mir-615-5p    | 5.536571677 | 0.002546 |
| hsa-mir-23a-5p    | 5.479908709 | 4.72E-08 |
| hsa-mir-888-3p    | 5.313469015 | 0.003979 |
| hsa-mir-3937      | 5.311168658 | 0.00489  |
| hsa-mir-5001-5p   | 5.269621673 | 0.003007 |
| hsa-mir-144-5p    | 5.226401556 | 3.23E-35 |
| hsa-mir-3679-5p   | 5.166979855 | 7.8E-05  |
| hsa-mir-4492      | 5.163014958 | 0.000125 |
| hsa-mir-4732-5p   | 5.131183186 | 0.000139 |
| hsa-mir-4741      | 5.079748452 | 0.000153 |
| hsa-mir-3913-1-5p | 4.988908301 | 0.005729 |
| hsa-mir-3154      | 4.973593475 | 0.007408 |
| hsa-mir-4711-5p   | 4.873385416 | 0.011004 |
| hsa-mir-449c-5p   | 4.84365578  | 7.61E-10 |
| hsa-mir-6727-5p   | 4.82369116  | 0.009674 |
| hsa-mir-199a-2-3p | 4.78188066  | 0.001039 |
| hsa-mir-4792      | 4.749834494 | 0.003258 |
| hsa-mir-10b-5p    | 4.703317623 | 2.28E-09 |
| hsa-mir-135a-1-3p | 4.663486707 | 1.31E-07 |
| hsa-mir-3150b-3p  | 4.604819601 | 0.000986 |
| hsa-mir-10a-5p    | 4.586851821 | 4.06E-11 |
| hsa-mir-875-5p    | 4.574541378 | 0.02003  |
| hsa-mir-6501-5p   | 4.515318008 | 0.001879 |
| hsa-mir-214-5p    | 4.515068612 | 2.52E-12 |
| hsa-mir-224-5p    | 4.509014911 | 2.57E-35 |
| hsa-mir-450b-3p   | 4.457671673 | 0.020733 |
| hsa-mir-449b-5p   | 4.445686838 | 4.32E-05 |
| hsa-mir-548ac     | 4.442071825 | 0.023328 |
| hsa-mir-3152-5p   | 4.406824605 | 0.036612 |
| hsa-mir-3940-5p   | 4.383428174 | 0.024559 |
| hsa-mir-573       | 4.350267753 | 0.025848 |
| hsa-mir-7641-1    | 4.345418817 | 0.04592  |
| hsa-mir-196b-3p   | 4.315677427 | 0.000558 |

|                  |             |          |
|------------------|-------------|----------|
| hsa-mir-21-5p    | 4.286838128 | 9.39E-68 |
| hsa-mir-4649-5p  | 4.284220542 | 0.007136 |
| hsa-mir-6125     | 4.271650171 | 0.002899 |
| hsa-mir-144-3p   | 4.219337399 | 2.96E-16 |
| hsa-mir-3920     | 4.109459812 | 0.044401 |
| hsa-mir-451a     | 4.096527861 | 7.68E-13 |
| hsa-mir-551b-5p  | 4.095224344 | 0.00018  |
| hsa-mir-493-5p   | 4.057823668 | 2.08E-08 |
| hsa-mir-135b-3p  | 4.012573246 | 2.9E-06  |
| hsa-mir-1193     | 4.001081848 | 0.054796 |
| hsa-mir-4433b-5p | 3.959245353 | 0.000213 |
| hsa-mir-6781-5p  | 3.950222004 | 0.07241  |
| hsa-mir-3144-5p  | 3.923773142 | 0.078102 |
| hsa-mir-4423-3p  | 3.897883408 | 0.000184 |
| hsa-mir-493-3p   | 3.881828409 | 1.38E-09 |
| hsa-mir-2115-5p  | 3.872872727 | 0.001596 |
| hsa-mir-4772-5p  | 3.853879734 | 0.001908 |
| hsa-mir-6720-3p  | 3.816643641 | 0.007899 |
| hsa-mir-3652     | 3.797572585 | 0.077263 |
| hsa-mir-6789-5p  | 3.790347197 | 0.074345 |
| hsa-mir-4420     | 3.782966445 | 0.074849 |
| hsa-mir-27a-5p   | 3.781444267 | 2.36E-09 |
| hsa-mir-152-5p   | 3.775886002 | 0.001036 |
| hsa-mir-214-3p   | 3.762880894 | 6.14E-10 |
| hsa-mir-3606-5p  | 3.740836791 | 0.094132 |
| hsa-mir-450b-5p  | 3.622671495 | 2.62E-14 |
| hsa-mir-3651     | 3.585175099 | 0.000424 |
| hsa-mir-4425     | 3.527773141 | 0.036325 |
| hsa-mir-24-2-5p  | 3.512296126 | 5.44E-38 |
| hsa-mir-3129-5p  | 3.511953024 | 0.001082 |
| hsa-mir-3667-3p  | 3.501295082 | 0.036336 |
| hsa-mir-3143     | 3.47687018  | 3.95E-06 |
| hsa-mir-653-3p   | 3.475809892 | 2.77E-07 |
| hsa-mir-4735-5p  | 3.468336361 | 0.063576 |
| hsa-mir-150-5p   | 3.441809783 | 1.18E-07 |
| hsa-mir-21-3p    | 3.384853023 | 1.6E-25  |
| hsa-mir-216a-3p  | 3.384423666 | 0.008186 |
| hsa-mir-92b-5p   | 3.374178997 | 1.24E-20 |
| hsa-mir-222-5p   | 3.346011938 | 1.19E-10 |
| hsa-mir-3151-5p  | 3.28726322  | 5.41E-05 |
| hsa-mir-142-3p   | 3.263198797 | 5.5E-10  |

|                   |             |          |
|-------------------|-------------|----------|
| hsa-mir-6502-5p   | 3.253964929 | 0.000104 |
| hsa-mir-653-5p    | 3.247047817 | 8.52E-08 |
| hsa-mir-1245a     | 3.242946008 | 0.029596 |
| hsa-mir-455-3p    | 3.234908476 | 2.16E-24 |
| hsa-mir-581       | 3.233345217 | 0.099567 |
| hsa-mir-503-5p    | 3.199446715 | 6.76E-12 |
| hsa-mir-4517      | 3.174231533 | 0.024433 |
| hsa-mir-155-5p    | 3.161263202 | 5.98E-26 |
| hsa-mir-193a-3p   | 3.120519531 | 1.23E-05 |
| hsa-mir-187-3p    | 3.099487298 | 0.000114 |
| hsa-mir-9-1-5p    | 3.088030078 | 0.012714 |
| hsa-mir-142-5p    | 3.083703236 | 3.14E-14 |
| hsa-mir-6783-5p   | 3.070817773 | 0.069103 |
| hsa-mir-4649-3p   | 3.05506392  | 5.85E-05 |
| hsa-mir-449a      | 3.04773531  | 1.21E-06 |
| hsa-mir-503-3p    | 3.046053501 | 0.003828 |
| hsa-mir-497-3p    | 3.038173332 | 1.51E-05 |
| hsa-mir-143-5p    | 3.020608046 | 2.99E-11 |
| hsa-mir-210-3p    | 2.999022745 | 1.62E-13 |
| hsa-mir-548ah-5p  | 2.997875771 | 5.59E-05 |
| hsa-mir-486-2-5p  | 2.993217334 | 1.43E-05 |
| hsa-mir-371b-5p   | 2.964888003 | 0.00038  |
| hsa-mir-497-5p    | 2.946719999 | 3.58E-27 |
| hsa-mir-219a-1-5p | 2.941168853 | 1.31E-05 |
| hsa-mir-7845-5p   | 2.930600707 | 0.025461 |
| hsa-mir-296-3p    | 2.92688727  | 1.35E-07 |
| hsa-mir-629-3p    | 2.925306851 | 6.7E-09  |
| hsa-mir-210-5p    | 2.885724503 | 1.55E-19 |
| hsa-mir-671-5p    | 2.879534696 | 6.8E-12  |
| hsa-mir-424-3p    | 2.847405877 | 2.36E-12 |
| hsa-mir-4648      | 2.842468096 | 0.001129 |
| hsa-mir-4802-5p   | 2.805186086 | 0.07693  |
| hsa-mir-431-5p    | 2.802158447 | 5.06E-05 |
| hsa-mir-6813-5p   | 2.779422326 | 0.049002 |
| hsa-mir-3125      | 2.749709627 | 0.003258 |
| hsa-mir-224-3p    | 2.740316448 | 0.00021  |
| hsa-mir-3648      | 2.732664667 | 0.009491 |
| hsa-mir-3616-3p   | 2.694608606 | 0.050318 |
| hsa-mir-190b      | 2.659951972 | 0.000729 |
| hsa-mir-92b-3p    | 2.655957808 | 1.61E-08 |
| hsa-mir-3681-5p   | 2.648658264 | 0.010004 |

|                 |             |          |
|-----------------|-------------|----------|
| hsa-mir-23a-3p  | 2.643320408 | 5.57E-23 |
| hsa-mir-605-3p  | 2.639788781 | 0.00039  |
| hsa-mir-145-3p  | 2.63313504  | 0.085883 |
| hsa-mir-2115-3p | 2.6268815   | 0.008701 |
| hsa-mir-208b-3p | 2.623669268 | 9.95E-11 |
| hsa-mir-4521    | 2.609264921 | 0.001404 |
| hsa-mir-3614-3p | 2.602107505 | 0.085883 |
| hsa-mir-551b-3p | 2.5963246   | 2.09E-08 |
| hsa-mir-195-3p  | 2.578475676 | 1.09E-11 |
| hsa-mir-618     | 2.576638569 | 2.65E-09 |
| hsa-mir-223-5p  | 2.574723893 | 7.34E-06 |
| hsa-mir-3653-5p | 2.572739801 | 0.002691 |
| hsa-mir-4529-3p | 2.545602948 | 0.082561 |
| hsa-mir-2114-3p | 2.52615738  | 0.004269 |
| hsa-mir-4777    | 2.514942667 | 0.04251  |
| hsa-mir-455-5p  | 2.507895919 | 9.53E-18 |
| hsa-mir-188-5p  | 2.494303025 | 1.49E-13 |
| hsa-mir-7705    | 2.485467174 | 8.84E-13 |
| hsa-mir-34a-5p  | 2.48024137  | 2.5E-11  |
| hsa-mir-489-3p  | 2.47817385  | 0.001413 |
| hsa-mir-7976    | 2.465812395 | 0.00116  |
| hsa-mir-1262    | 2.451160333 | 1.22E-08 |
| hsa-mir-221-5p  | 2.422283786 | 2.64E-05 |
| hsa-mir-217     | 2.390310949 | 0.012097 |
| hsa-mir-335-5p  | 2.368474571 | 1.32E-05 |
| hsa-mir-1228-5p | 2.341541147 | 3.13E-05 |
| hsa-mir-1228-3p | 2.337993802 | 9.24E-12 |
| hsa-mir-34a-3p  | 2.322649695 | 5.25E-09 |
| hsa-mir-150-3p  | 2.320024718 | 0.001413 |
| hsa-mir-3660    | 2.299181705 | 0.078343 |
| hsa-mir-944     | 2.290271539 | 0.001009 |
| hsa-mir-486-5p  | 2.253027222 | 0.001128 |
| hsa-mir-452-5p  | 2.239374262 | 1.45E-06 |
| hsa-mir-1276    | 2.230785921 | 0.000585 |
| hsa-mir-675-3p  | 2.227597422 | 0.018361 |
| hsa-mir-130a-3p | 2.224897036 | 2.73E-19 |
| hsa-mir-3194-5p | 2.224266896 | 0.000168 |
| hsa-mir-31-5p   | 2.213113642 | 0.001585 |
| hsa-mir-3144-3p | 2.212310666 | 0.09439  |
| hsa-mir-4709-3p | 2.184555208 | 0.084189 |
| hsa-mir-365b-5p | 2.180101164 | 0.000106 |

|                   |             |          |
|-------------------|-------------|----------|
| hsa-mir-4758-3p   | 2.174043188 | 0.013898 |
| hsa-mir-3065-3p   | 2.164016919 | 0.001009 |
| hsa-mir-500b-3p   | 2.148243706 | 0.015018 |
| hsa-mir-2114-5p   | 2.118147291 | 0.039047 |
| hsa-mir-148a-3p   | 2.095352716 | 0.002162 |
| hsa-mir-542-5p    | 2.089303642 | 0.000397 |
| hsa-mir-502-3p    | 2.085863982 | 6.54E-08 |
| hsa-mir-1247-3p   | 2.083392861 | 0.004804 |
| hsa-mir-130a-5p   | 2.076211659 | 4.15E-05 |
| hsa-mir-16-2-5p   | 2.075702911 | 0.046842 |
| hsa-mir-25-5p     | 2.07241588  | 3.43E-08 |
| hsa-mir-135b-5p   | 2.071163782 | 0.001585 |
| hsa-mir-3129-3p   | 2.06014871  | 0.000147 |
| hsa-mir-3687      | 2.043425119 | 0.017386 |
| hsa-mir-3659      | 2.018908799 | 0.034391 |
| hsa-mir-193a-5p   | 2.000240214 | 0.000122 |
| hsa-mir-335-3p    | 1.969685982 | 0.006313 |
| hsa-mir-27a-3p    | 1.943334761 | 6.75E-08 |
| hsa-mir-4443      | 1.872535318 | 0.063487 |
| hsa-mir-376a-2-5p | 1.87016591  | 0.036421 |
| hsa-mir-125b-1-5p | 1.853185987 | 0.037788 |
| hsa-mir-15b-3p    | 1.845616161 | 3.75E-05 |
| hsa-mir-3940-3p   | 1.841297504 | 0.001408 |
| hsa-mir-215-5p    | 1.83030077  | 0.005729 |
| hsa-mir-3194-3p   | 1.826913167 | 0.07403  |
| hsa-mir-4803      | 1.806016361 | 0.014746 |
| hsa-mir-483-5p    | 1.790356845 | 0.052319 |
| hsa-mir-223-3p    | 1.781544573 | 0.000182 |
| hsa-mir-18b-3p    | 1.76742456  | 0.058868 |
| hsa-mir-4709-5p   | 1.7469835   | 0.049839 |
| hsa-mir-3176      | 1.734054519 | 2.4E-07  |
| hsa-mir-6852-5p   | 1.723758637 | 0.001401 |
| hsa-mir-4690-3p   | 1.705674515 | 0.085883 |
| hsa-mir-4687-3p   | 1.705132464 | 0.078102 |
| hsa-mir-146b-3p   | 1.688348474 | 2.06E-05 |
| hsa-let-7c-3p     | 1.687789091 | 4.36E-10 |
| hsa-mir-339-5p    | 1.686605981 | 0.004379 |
| hsa-mir-494-3p    | 1.684042774 | 0.011388 |
| hsa-mir-1248      | 1.680062251 | 0.083343 |
| hsa-mir-3922-3p   | 1.670103933 | 0.000676 |
| hsa-mir-3607-3p   | 1.665333214 | 0.00036  |

|                  |             |          |
|------------------|-------------|----------|
| hsa-mir-532-3p   | 1.655178084 | 2.63E-07 |
| hsa-mir-542-3p   | 1.640358045 | 0.001794 |
| hsa-mir-222-3p   | 1.637117311 | 0.000468 |
| hsa-mir-1247-5p  | 1.620314816 | 0.034315 |
| hsa-mir-3942-5p  | 1.613380678 | 0.044401 |
| hsa-mir-452-3p   | 1.609705392 | 0.003298 |
| hsa-mir-2277-5p  | 1.58357003  | 2.66E-13 |
| hsa-mir-5002-5p  | 1.544243344 | 0.004841 |
| hsa-mir-548a1    | 1.522041209 | 0.003396 |
| hsa-mir-548ba    | 1.521477688 | 0.025848 |
| hsa-mir-3622a-3p | 1.513949174 | 0.014239 |
| hsa-mir-488-5p   | 1.496687639 | 0.04027  |
| hsa-mir-942-5p   | 1.477391243 | 0.001145 |
| hsa-mir-548e-3p  | 1.475200257 | 0.001457 |
| hsa-mir-31-3p    | 1.471610377 | 0.063755 |
| hsa-mir-148a-5p  | 1.450328071 | 0.04555  |
| hsa-mir-5091     | 1.440495483 | 0.062329 |
| hsa-mir-3661     | 1.394569619 | 0.00017  |
| hsa-mir-3065-5p  | 1.374175461 | 0.0503   |
| hsa-mir-337-3p   | 1.367780501 | 0.031006 |
| hsa-mir-221-3p   | 1.356747064 | 0.004711 |
| hsa-mir-106b-3p  | 1.319560047 | 1.03E-07 |
| hsa-mir-4775     | 1.285673282 | 1.11E-05 |
| hsa-mir-877-5p   | 1.284517571 | 5.42E-08 |
| hsa-mir-195-5p   | 1.284238258 | 1.52E-05 |
| hsa-mir-28-5p    | 1.27851179  | 0.000435 |
| hsa-mir-362-3p   | 1.261121222 | 0.007136 |
| hsa-mir-152-3p   | 1.260255395 | 0.003994 |
| hsa-mir-1468-5p  | 1.251278681 | 0.009171 |
| hsa-mir-423-3p   | 1.244585844 | 0.000319 |
| hsa-mir-502-5p   | 1.242368493 | 0.008283 |
| hsa-mir-15b-5p   | 1.238590423 | 0.00427  |
| hsa-mir-30d-3p   | 1.237730301 | 1.9E-06  |
| hsa-mir-193b-5p  | 1.23168067  | 0.000865 |
| hsa-mir-532-5p   | 1.228978092 | 2.6E-05  |
| hsa-mir-4326     | 1.222525482 | 0.028057 |
| hsa-mir-652-5p   | 1.215158205 | 0.007342 |
| hsa-mir-589-3p   | 1.211485868 | 0.008804 |
| hsa-mir-126-3p   | 1.187123192 | 8.96E-06 |
| hsa-mir-501-3p   | 1.175903225 | 0.082561 |
| hsa-mir-125a-3p  | 1.152142926 | 0.000538 |

|                  |             |          |
|------------------|-------------|----------|
| hsa-mir-363-3p   | 1.143863016 | 0.000231 |
| hsa-mir-92a-1-5p | 1.139003545 | 0.06023  |
| hsa-mir-660-3p   | 1.131528943 | 0.010643 |
| hsa-mir-145-5p   | 1.112050845 | 0.00069  |
| hsa-mir-671-3p   | 1.079562258 | 0.003772 |
| hsa-mir-296-5p   | 1.057528607 | 0.021065 |
| hsa-mir-28-3p    | 1.030273339 | 2.95E-05 |
| hsa-mir-22-5p    | 1.028234596 | 0.003795 |
| hsa-mir-93-3p    | 1.020870424 | 0.055331 |
| hsa-mir-20b-5p   | 1.017728002 | 0.002664 |
| hsa-mir-3691-5p  | 1.015500511 | 0.086964 |
| hsa-mir-30b-3p   | 1.007876989 | 0.058235 |
| hsa-mir-708-5p   | 1.003105777 | 0.028869 |
| hsa-mir-548b-3p  | 0.989668069 | 0.045466 |
| hsa-mir-29b-1-5p | 0.979171562 | 0.018663 |
| hsa-mir-365a-5p  | 0.97864232  | 0.063487 |
| hsa-let-7c-5p    | 0.969665784 | 0.000969 |
| hsa-mir-500a-3p  | 0.96851741  | 0.000676 |
| hsa-mir-22-3p    | 0.954830527 | 0.000112 |
| hsa-mir-320a     | 0.946964376 | 1.49E-05 |
| hsa-mir-423-5p   | 0.939106154 | 0.001088 |
| hsa-mir-339-3p   | 0.939050496 | 1.28E-05 |
| hsa-mir-4645-3p  | 0.894507086 | 0.028869 |
| hsa-mir-708-3p   | 0.88225033  | 0.059794 |
| hsa-mir-186-3p   | 0.878073991 | 0.08693  |
| hsa-mir-106a-5p  | 0.875773005 | 0.013765 |
| hsa-mir-200b-3p  | 0.871480659 | 0.035436 |
| hsa-mir-3187-3p  | 0.867203895 | 0.092431 |
| hsa-mir-424-5p   | 0.856745368 | 0.056305 |
| hsa-mir-664a-5p  | 0.843250825 | 0.001121 |
| hsa-mir-25-3p    | 0.800612988 | 7.28E-05 |
| hsa-mir-627-5p   | 0.767598621 | 0.063697 |
| hsa-mir-93-5p    | 0.751179377 | 0.000194 |
| hsa-mir-342-5p   | 0.720584364 | 0.025213 |
| hsa-mir-501-5p   | 0.717129359 | 0.030507 |
| hsa-mir-99a-3p   | 0.645931205 | 0.037788 |
| hsa-mir-454-3p   | 0.636579146 | 0.005984 |
| hsa-mir-106b-5p  | 0.615864603 | 0.061155 |



**Supplemental Table S7: Delta-Ct values of hypoedited miRNAs in GBM which are downregulated when compared to both FC and CC samples**

| hsa-miR-889 |         | hsa-miR-598 |         | hsa-miR-377 |         | hsa-miR-411 |         |
|-------------|---------|-------------|---------|-------------|---------|-------------|---------|
| 889_CC      | 889_GBM | 598_CC      | 598_GBM | 377_CC      | 377_GBM | 411_CC      | 411_GBM |
| -5.84       | -6.7    | -4.26       | -4.83   | -6.64       | -7.50   | -5.17       | -6.17   |
| -5.49       | -6.79   | -4.60       | -5.48   | -7.01       | -8.46   | -5.15       | -4.91   |
| -6.77       | -8.66   | -4.32       | -5.18   | -8.50       | -8.28   | -4.92       | -5.83   |
| -5.23       | -7.30   | -3.10       | -6.16   | -7.07       | -9.46   | -3.66       | -4.82   |
| -6.08       | -8.91   | -4.2        | -5.90   | -7.11       | -9.31   | -4.33       | -7.16   |

**Supplemental Table S8: C-to-U hypoedited miRNAs in Glioblastoma Multiforme (GBM)**

| miRNAs            | aPresence in samples | bMedian editing (in %) | Seed editing event | Position in precursor | Target Prediction Before/After editing | cOverlap (%) |
|-------------------|----------------------|------------------------|--------------------|-----------------------|----------------------------------------|--------------|
| hsa-mir-29a-3p    | 4/5/0                | 0.17/0.2/0             | Yes                | 48                    | 851/164                                | 11 (1.29)    |
| hsa-mir-23b-3p    | 0/3/0                | 0/0.51/0               | Yes                | 60                    | 838/1150                               | 152 (18.14)  |
| hsa-mir-100-5p    | 6/6/3                | 1.20/1.06/0.12         | No                 | 25                    | NA                                     | NA           |
| hsa-mir-99a-5p    | 6/6/5                | 2.63/4.05/1            | No                 | 25                    | NA                                     | NA           |
| hsa-mir-125a-5p   | 5/0/0                | 0.19/0/0               | No                 | 25                    | NA                                     | NA           |
| hsa-mir-374b-5p   | 4/5/0                | 0.32/0.27/0            | No                 | 22                    | NA                                     | NA           |
| hsa-mir-33a-5p    | 4/4/0                | 1.15/0.97/0            | No                 | 20                    | NA                                     | NA           |
| hsa-mir-204-5p    | 1/5/0                | -/0.2/0                | No                 | 43                    | NA                                     | NA           |
| hsa-mir-99b-5p    | 2/3/0                | -/0.78/0               | No                 | 19                    | NA                                     | NA           |
| hsa-mir-219a-2-5p | 1/3/0                | -/0.27/0               | No                 | 33                    | NA                                     | NA           |

10 miRNAs were found to be significantly hypoedited in GBM (wilcoxon-two-tailed,  $p < 0.05$ ). All the events reported are novel hypoediting events.

**a:** Presence in samples (FC/CC/GBM)

**b:** Median editing (FC/CC/GBM)

**c:** Percentage overlap was calculated by overlapped targets/targets before editing

NA, not applicable because they were not seed editing events

"-" indicates miRNAs where median value could not be calculated
